# Supplementary material for: A population-based observational study of diabetes during pregnancy in Victoria, Australia, 1999–2008
Source: PubMed Central journal article supplement — BMJ Open. 2014 Nov 14;4(11):e005394. doi: 10.1136/bmjopen-2014-005394 (PMC4244457; doi:10.1136/bmjopen-2014-005394), 2014-11-14
Supplement: bmjopen-2014-005394.draft_revisions.pdf [file bmjopen-2014-005394.draft_revisions.pdf]

# BMJ Open

## Rising maternal age does not fully explain the increasing prevalence of diabetes in pregnancy trends in Victoria, Australia, 1999-2008

|                                 |                                                                                                                                                                                                                                                                                                                                                                                                                                                                                                                                                                                                                                                                                                                                                                                                                                                                                                                                                                                                                                             |
|---------------------------------|---------------------------------------------------------------------------------------------------------------------------------------------------------------------------------------------------------------------------------------------------------------------------------------------------------------------------------------------------------------------------------------------------------------------------------------------------------------------------------------------------------------------------------------------------------------------------------------------------------------------------------------------------------------------------------------------------------------------------------------------------------------------------------------------------------------------------------------------------------------------------------------------------------------------------------------------------------------------------------------------------------------------------------------------|
| Journal:                        | <i>BMJ Open</i>                                                                                                                                                                                                                                                                                                                                                                                                                                                                                                                                                                                                                                                                                                                                                                                                                                                                                                                                                                                                                             |
| Manuscript ID:                  | bmjopen-2014-005394                                                                                                                                                                                                                                                                                                                                                                                                                                                                                                                                                                                                                                                                                                                                                                                                                                                                                                                                                                                                                         |
| Article Type:                   | Research                                                                                                                                                                                                                                                                                                                                                                                                                                                                                                                                                                                                                                                                                                                                                                                                                                                                                                                                                                                                                                    |
| Date Submitted by the Author:   | 03-Apr-2014                                                                                                                                                                                                                                                                                                                                                                                                                                                                                                                                                                                                                                                                                                                                                                                                                                                                                                                                                                                                                                 |
| Complete List of Authors:       | Abouzeid, Marian; Monash University, Department of Epidemiology and Preventive Medicine<br>Versace, Vincent; Flinders and Deakin Universities, Greater Green Triangle University Department of Rural Health<br>Janus, Edward; Department of Medicine, NorthWest Academic Centre, The University of Melbourne, Western Hospital, ; Flinders and Deakin Universities, Greater Green Triangle University Department of Rural Health<br>Davey, Mary-Ann; Department of Health, Consultative Council on Obstetric and Paediatric Mortality and Morbidity, Clinical Councils Unit; La Trobe University, Judith Lumley Centre<br>Philpot, Ben; Greater Green Triangle University Department of Rural Health, Flinders and Deakin Universities,<br>Oats, Jeremy; Department of Health, Consultative Council on Obstetric and Paediatric Mortality and Morbidity, Clinical Councils Unit; The University of Melbourne, Melbourne School of Population and Global Health<br>Dunbar, James; Flinders University, GGT UDRH; Deakin University, GGT UDRH |
| <b>Primary Subject Heading</b>: | Diabetes and endocrinology                                                                                                                                                                                                                                                                                                                                                                                                                                                                                                                                                                                                                                                                                                                                                                                                                                                                                                                                                                                                                  |
| Secondary Subject Heading:      | Diabetes and endocrinology, Public health                                                                                                                                                                                                                                                                                                                                                                                                                                                                                                                                                                                                                                                                                                                                                                                                                                                                                                                                                                                                   |
| Keywords:                       | Diabetes in pregnancy < DIABETES & ENDOCRINOLOGY, PREVENTIVE MEDICINE, PUBLIC HEALTH                                                                                                                                                                                                                                                                                                                                                                                                                                                                                                                                                                                                                                                                                                                                                                                                                                                                                                                                                        |
|                                 |                                                                                                                                                                                                                                                                                                                                                                                                                                                                                                                                                                                                                                                                                                                                                                                                                                                                                                                                                                                                                                             |

SCHOLARONE™  
Manuscripts

1  
2  
3 **Rising maternal age does not fully explain the increasing prevalence**  
4 **of diabetes in pregnancy trends in Victoria, Australia, 1999-2008.**  
5  
6

7 **Running title: Secular trends in prevalence of diabetes in pregnancy**  
8

9 **Marian Abouzeid<sup>1,2</sup>, Vincent L Versace<sup>1</sup>, Edward D Janus<sup>1,3</sup>, Mary-Ann**  
10 **Davey<sup>4,5</sup>, Benjamin Philpot<sup>1</sup>, Jeremy Oats<sup>4,6</sup>, James A Dunbar<sup>1</sup>**  
11

- 12 1. Greater Green Triangle University Department of Rural Health  
13 Flinders and Deakin Universities  
14 Warrnambool, Victoria, Australia
- 15 2. Department of Epidemiology and Preventive Medicine  
16 Monash University  
17 Victoria, Australia
- 18 3. Department of Medicine, Northwest Academic Centre  
19 The University of Melbourne and Western Health  
20 Victoria, Australia
- 21 4. Consultative Council on Obstetric and Paediatric Mortality and Morbidity,  
22 Clinical Councils Unit  
23 Department of Health  
24 Victoria, Australia
- 25 5. Judith Lumley Centre  
26 La Trobe University  
27 Victoria, Australia
- 28 6. Melbourne School of Population and Global Health  
29 The University of Melbourne  
30 Victoria, Australia

31  
32  
33 **Corresponding author**

34 Professor James Dunbar  
35 Greater Green Triangle University Department of Rural Health  
36 Flinders and Deakin Universities  
37 P.O Box 423, Warrnambool 3280  
38 Victoria, Australia  
39 PH: +61 3 5563 3504  
40 Fax: +61 3 5563 3144  
41 Email: [director@greaterhealth.org](mailto:director@greaterhealth.org)  
42  
43  
44  
45  
46  
47  
48  
49  
50  
51  
52  
53  
54  
55  
56  
57  
58  
59  
60

## Abstract

**Objectives:** This paper reports secular trends in diabetes in pregnancy in Victoria, Australia and examines the effect of including or excluding women with pre-existing diabetes on gestational diabetes (GDM) prevalence estimates.

**Design:** population-based observational study

**Setting:** all births in Victoria, Australia between 1999 and 2008

**Participants:** 634,932 pregnancies resulting in a birth registered with the Victorian Perinatal Data Collection

**Outcome measures:** crude and age-standardised secular trends in pre-existing diabetes and GDM prevalence; secular GDM trends by maternal birthplace; effects on GDM prevalence of including and excluding pre-existing diabetes from the denominator.

**Results:** Of the 634,932 pregnancies, 2954 (0.5%) occurred in women with pre-existing diabetes and 29,147 (4.6%) were complicated by GDM. Mean maternal age increased from 29.7 years in 1999 to 30.8 years in 2008. GDM prevalence increased in most maternal age groups. In 2008, age-standardised GDM prevalence was 31% higher than in 1999; secular increases were greater for Australian-born non-Indigenous (29% increase) than immigrant women (12.3% increase). The annual number of pregnancies in women with pre-existing diabetes almost doubled from 1999 to 2008 and prevalence increased from 0.4% to 0.6%. However including or excluding pre-existing diabetes had little effect on GDM prevalence estimates.

**Conclusions:** Pre-existing diabetes and GDM prevalence increased in Victoria between 1999 and 2008 and rising maternal age does not fully explain these trends. These findings have important implications for preventive initiatives. Including or excluding small numbers of women with pre-existing diabetes resulted in minimal

1  
2  
3 changes in GDM estimates. As pre-existing diabetes in young women increases, this  
4  
5 methodological issue will likely become important.  
6  
7  
8  
9  
10  
11  
12  
13  
14  
15

### 16 **Strengths and limitations of this study**

- 17  
18 • This study reports secular trends in Australian population-level prevalence of pre-  
19 existing diabetes in pregnancy and GDM using data collected over ten years from  
20 a comprehensive perinatal database that captures virtually all births in the state.  
21 Recording of GDM and pre-existing diabetes in this database have been shown to  
22 be highly accurate.  
23  
24
- 25 • This paper also examines an important epidemiological issue of the effect of  
26 including or excluding the growing group of women with pre-existing diabetes on  
27 GDM prevalence estimates. This methodological consideration is likely to  
28 become increasingly important as the number of women with pre-existing  
29 diabetes increases.  
30  
31
- 32 • As this study uses population-level administrative data it is not possible to identify  
33 unscreened pregnancies and screening practice may have changed over time.  
34  
35  
36  
37  
38  
39  
40  
41  
42  
43  
44  
45  
46  
47  
48  
49  
50  
51  
52  
53  
54  
55  
56  
57  
58  
59  
60

## Introduction

True pregnancy-induced hyperglycemia differs from pre-existing maternal diabetes. Pregnancy is diabetogenic: insulin resistance increases with advancing gestation to ensure glucose availability to the developing fetus. Maternal insulin secretion normally increases in response; if insufficient to overcome the insulin resistance, hyperglycemia occurs. Pre-pregnancy glycemic control is usually restored after delivery (1). This differs from pre-existing maternal type 1 and type 2 diabetes, which are neither induced by pregnancy nor resolve post-partum. Any form of diabetes in pregnancy increases risk of a range of adverse maternal and neonatal outcomes; risk of some such complications is greater with pre-existing diabetes (2, 3). Moreover, pre-existing maternal diabetes in pregnancy presents particular management issues (4).

By definition, gestational diabetes mellitus (GDM) describes glucose intolerance that begins or is first recognised during pregnancy (5). Therefore, GDM encompasses both true pregnancy-induced hyperglycemia and diabetes pre-dating pregnancy but previously undiagnosed. Pre-existing diabetes is confirmed if post-partum testing demonstrates persistent dysglycemia fulfilling non-pregnancy diagnostic thresholds for diabetes (6). However, antenatal records and birth reports, commonly used to ascertain GDM prevalence, are completed before these tests are conducted and their results known.

Prevalence of diagnosed pre-existing diabetes among pregnant women is generally increasing (3, 7-12). Recent secular increases in GDM burden have also been documented in Manitoba (13) and London, Canada (11), Tianjin, China (14) and Bahrain (15). From across the United States there are reports of increasing GDM (9,

1  
2  
3 12, 16, 17), increases followed by a levelling off (18), no temporal changes (7) and  
4  
5 fluctuations in disease burden over time (19). In Australia, over recent decades rising  
6  
7 GDM burden has been reported (3, 20-23); trends in diabetes in pregnancy amongst  
8  
9 Indigenous Australian women are inconsistent (10, 20, 24-26).

10  
11  
12 There are several methodological issues surrounding GDM epidemiology, including  
13  
14 denominator selection (27). For example, Australian GDM studies have included in  
15  
16 the denominator all pregnant women/births/confinements (2, 3, 10, 20, 24-26, 28),  
17  
18 only singleton pregnancies (29, 30), only screened/tested pregnancies (22, 31),  
19  
20 excluded women with pre-existing diabetes (23, 30) and/or reported prevalence of all  
21  
22 forms of diabetes in pregnancy collectively (10, 24, 26). Similar methodological  
23  
24 variation exists internationally.  
25  
26  
27

28  
29 The International Association of Diabetes and Pregnancy Study Group (IADPSG)  
30  
31 recognises the issues associated with including women with pre-existing diabetes  
32  
33 together with those with 'true' GDM (32). New IADPSG recommendations advise  
34  
35 that all or high-risk women without known glucose abnormalities undergo fasting  
36  
37 plasma glucose (FPG), random plasma glucose (RPG) or hemoglobin A1c (HbA1c)  
38  
39 testing at the first antenatal visit. This is to identify 'overt' diabetes (FPG  
40  
41  $\geq 7.0$ mmol/L or HbA1c  $\geq 6.5\%$  or random plasma glucose  $\geq 11.1$ mmol/L and  
42  
43 confirmed with FPG or HbA1c result) and early-onset GDM (32). The Australasian  
44  
45 Diabetes in Pregnancy Society (ADIPS) recommends that high-risk women have a  
46  
47 75g oral glucose tolerance test (OGTT) as soon as possible after conception to detect  
48  
49 GDM (6). Both authorities recommend universal testing of remaining women using  
50  
51 OGTT at 24-28 weeks to identify additional cases (6, 32). The FPG level considered  
52  
53 diagnostic of GDM will be reduced from  $\geq 5.5$ mmol/L to  $\geq 5.1$ mmol/L, and the two-  
54  
55 hour plasma glucose threshold is to increase from  $\geq 8.0$ mmol/L to  $\geq 8.5$ mmol/L (6).  
56  
57  
58  
59  
60

1  
2  
3 These guidelines are expected to substantially increase the number of women  
4 diagnosed with GDM (33). The IADPSG and ADIPSG diagnostic criteria recommend  
5 dispensing with the Glucose Challenge Test (GCT). The GCT misses 25% of GDM  
6 cases and consequently adoption of this step alone is likely to be a significant  
7 contributor to the increased diagnostic rates of GDM (34). The IADPSG  
8 recommendations are also intended to increase detection of pre-existing diabetes. As  
9 diagnosed pre-existing diabetes rises, the methodology used to calculate GDM  
10 prevalence may influence the estimates due to differing denominator sizes,  
11 particularly amongst ethnic groups and in settings where pre-existing diabetes  
12 prevalence is high. Such variation has a range of potential implications, including for  
13 funding and health service planning.  
14  
15

16  
17  
18  
19  
20  
21  
22  
23  
24  
25  
26  
27  
28 No recent population-level Australian studies examine longitudinal trends in pre-  
29 existing maternal diabetes (3), and few report recent trends in burden of GDM overall  
30 (20, 23) or among various migrant groups (20). Using data routinely collected over  
31 ten years from the state of Victoria, Australia, we investigated firstly, secular trends in  
32 prevalence of pre-existing diabetes in pregnancy; secondly, trends in GDM burden;  
33 and finally, the effects of including and excluding women with pre-existing diabetes  
34 on GDM prevalence estimates.  
35  
36  
37  
38  
39  
40  
41  
42  
43

#### 44 **Methods**

45  
46  
47 The Victorian Perinatal Data Collection (VPDC) is a population-based surveillance  
48 system, maintained by the Consultative Council on Obstetric and Paediatric Mortality  
49 and Morbidity, Victorian Department of Health. Information is routinely collected on  
50 all births of at least 20 weeks' gestation (or if gestation is not known, birthweight of at  
51 least 400g). Birth report forms are completed at delivery by a clinician; notification of  
52  
53  
54  
55  
56  
57  
58  
59  
60

1  
2  
3 births to the VPDC by hospitals, birthing centres and private midwife practitioners is  
4  
5 mandatory. Therefore, the database is considered to completely capture virtually all  
6  
7 births in Victoria that fulfil reporting requirements.  
8  
9

10  
11 De-identified data were extracted for all notified births that occurred in Victoria  
12  
13 between 1 January 1999 and 31 December 2008. For pregnancies yielding more than  
14  
15 one birth (i.e. twins or more), only the birth record for the first-born infant was  
16  
17 extracted. Each entry therefore represents one pregnancy. As women may have had  
18  
19 more than one pregnancy during the study period, the same woman may be  
20  
21 represented in the data set multiple times. Variables used in this analysis were year of  
22  
23 delivery, maternal age at delivery (categorised into age groups of  $\leq 24$  years, 25-29,  
24  
25 30-34, 35-39,  $\geq 40$  years), parity, diabetes status (GDM, pre-existing maternal diabetes  
26  
27 not further specified, no diabetes), maternal Aboriginal and Torres Strait Islander (i.e.  
28  
29 Indigenous) status and maternal country of birth. Maternal country of birth was  
30  
31 reclassified into geographically-based regions using the Australian Bureau of  
32  
33 Statistics' *Standard Australian Classification of Countries*. This classification scheme  
34  
35 includes Australia in the group *Oceania and Antarctica*. However we categorised  
36  
37 Australian-born women separately into two additional groups: *Australian-born*  
38  
39 *Indigenous* and *Australian-born non-Indigenous*.  
40  
41  
42  
43

44  
45 Maternal diabetes status was assigned based on whether the clinician completing the  
46  
47 notification form ticked the checkboxes for GDM or pre-existing maternal diabetes.  
48  
49 Recording of GDM and pre-existing diabetes in the VPDC are reported to be 99.4%  
50  
51 and 99.8% accurate, respectively (35). Over the study period, Australian guidelines  
52  
53 recommended universal offer of GDM screening, with selective screening of high risk  
54  
55 women considered appropriate in resource limited or low prevalence settings.  
56  
57 Screening is performed at 26-28 weeks gestation and a positive result is a 1-hr venous  
58  
59  
60



1  
2  
3 FPG level of  $\geq 7.8$  mmol/L after a morning, non-fasting 50g glucose load or  
4  
5  $\geq 8$  mmol/L after a morning, non-fasting 75g glucose load. Confirmation of GDM  
6  
7 diagnosis after a positive screening test requires an OGTT at 26-30 weeks gestation  
8  
9 with venous plasma glucose levels of  $\geq 5.5$  mmol/L at 0 hours and/or  $\geq 8$  mmol/L at  
10  
11 2 hours (5).  
12

### 13 14 15 *Statistical analyses* 16

17  
18 Maternal demographic characteristics over time were examined using descriptive  
19  
20 statistics. Crude and age-standardised annual prevalence rates of pre-existing diabetes,  
21  
22 GDM and all diabetes were calculated as a percentage of total annual pregnancies,  
23  
24 using direct standardisation to the maternal age structure of the entire study  
25  
26 population. GDM prevalence rates over time were further examined by maternal age  
27  
28 group and region of birth. Small numbers precluded similar analyses for pre-existing  
29  
30 diabetes. To examine the effect of denominator variation on overall GDM prevalence  
31  
32 estimates, annual GDM prevalence rates were also calculated after excluding from the  
33  
34 denominator pregnancies in women with pre-existing diabetes.  
35  
36

37  
38 Women who had more than one pregnancy during the study period were included in  
39  
40 each year that they delivered. This approach, coupled with the fact that having  
41  
42 diabetes of any form in pregnancy increases the likelihood of diabetes in subsequent  
43  
44 pregnancies, meant that observations were not necessarily independent. As the  
45  
46 assumption of independence that underlies tests for linear trend was not fulfilled, such  
47  
48 analyses were not performed on the full dataset, and age-standardised prevalence rates  
49  
50 were considered significantly different if 95% confidence intervals did not overlap.  
51  
52 For sensitivity analysis, annual prevalence rates of pre-existing diabetes, GDM and all  
53  
54 diabetes were calculated after restricting to women giving birth for the first time.  
55  
56  
57  
58  
59  
60

1  
2  
3 Data were analysed using Stata 11.0. Permission to access and analyse data was  
4 granted by the Consultative Council on Obstetric and Paediatric Mortality and  
5 Morbidity, Victorian Department of Health. The Flinders University Social and  
6 Behavioural Research ethics committee exempted this study from requiring ethics  
7 approval, as it involved analysis of existing de-identified data.  
8  
9  
10  
11  
12

## 13 14 15 **Results**

16  
17  
18 During the ten-year study period, there were 634,932 pregnancies resulting in a birth  
19 registration with the VPDC (Table 1). In 2008 there were 15.7% more pregnancies  
20 than in 1999. Mean maternal age increased from 29.7 years in 1999 to 30.8 years in  
21 2008. The number of births to women aged 40 years and over was 91.3% higher in  
22 2008 than in 1999.  
23  
24  
25  
26  
27  
28

29  
30 Maternal region of birth was known for 99.7% ( $n=632,805$ ) of pregnancies, of which  
31 74.6% occurred in Australian-born women of non-Indigenous descent (Table 1).  
32 There was an overall trend of an increasing number of pregnancies in women born in  
33 all regions, with the exception of North-West Europe and Southern and Eastern  
34 Europe where there was a decline. The trend of increasing pregnancies was  
35 particularly strong in women from Southern and Central Asia (Table 1). The number  
36 of women becoming pregnant for the first time increased during the study period with  
37 5,486 (22.1%) more first pregnancies recorded in 2008 compared with 1999 (Table  
38 1).  
39  
40  
41  
42  
43  
44  
45  
46  
47  
48  
49

### 50 51 ***Diabetes in pregnancy***

52  
53 In 2008, 6.1% of all pregnancies were complicated by some form of diabetes,  
54 compared with 4.3% in 1999 (Table 2). Each year, pregnancies occurring in older  
55  
56  
57  
58  
59  
60

1  
2  
3 women (those aged 35-39 years and 40 years or older) had higher prevalence of any  
4 form of diabetes than pregnancies in younger women (data not shown).  
5  
6  
7

### 8 ***Prevalence of pre-existing maternal diabetes in pregnancy***

9  
10  
11 Between 1999 and 2008, 2,954 pregnancies (0.5%) occurred in women with known  
12 pre-existing diabetes. The prevalence rate of pre-existing diabetes increased from  
13 0.4% to 0.6%, representing an increase of 50% over the study period and there was  
14 little difference between the crude and age-standardised estimates (Figure 1a). The  
15 absolute annual number of pregnancies in women with pre-existing diabetes almost  
16 doubled over this period.  
17  
18  
19

20 For the entire ten-year period, the greatest absolute number of pregnancies in women  
21 with pre-existing diabetes occurred in Australian-born non-Indigenous women, and  
22 for the migrant groups, in those born in South-East Asia and Southern and Central  
23 Asia; pre-existing diabetes prevalence rates were however highest in pregnancies  
24 among women born in Southern and Central Asia and Sub-Saharan Africa (data not  
25 shown).  
26  
27  
28  
29  
30  
31  
32  
33  
34  
35  
36  
37  
38

### 39 ***Prevalence of GDM***

40  
41  
42 Of all pregnancies in Victoria from 1999 to 2008, 29,147 (4.6%) were complicated by  
43 GDM. Overall, the annual number of GDM pregnancies increased by 64% between  
44 1999 and 2008. Increases in the absolute number of GDM pregnancies over time were  
45 apparent in all but the youngest group of women (Fig. 1b). GDM also increased as a  
46 proportion of total pregnancies, such that in 2008, the age-standardised GDM  
47 prevalence rate was 31% higher than in 1999 (Table 2). Over the study period, crude  
48 GDM prevalence rates tended to increase in pregnancies among women in most age  
49  
50  
51  
52  
53  
54  
55  
56  
57  
58  
59  
60

1  
2  
3 groups (Figure 1c). Analysis of data from women in their first pregnancy who did not  
4  
5 have pre-existing diabetes revealed a significant positive trend in the prevalence of  
6  
7 the crude ( $p<0.001$ ) and age-standardised ( $p<0.001$ ) rates of GDM over the study  
8  
9 period.  
10

11  
12 Considerable differences in GDM prevalence rates existed by maternal region of birth  
13  
14 (Figure 2). Prevalence increased over time, both amongst Australian-born non-  
15  
16 Indigenous women and overseas-born women considered collectively. However, the  
17  
18 same pattern was not evident when considering Indigenous Australians and each  
19  
20 migrant group individually. The extent of the changes in GDM prevalence rates over  
21  
22 time varied by migrant origin status. In Australian-born non-Indigenous women, age-  
23  
24 standardised GDM prevalence in 2007 and 2008 was 29% higher than in 1999 and  
25  
26 2000 (4.0% vs. 3.1%), whereas amongst all overseas-born women collectively,  
27  
28 prevalence increased by 12.3% between these two time periods (8.2% vs. 7.3%;  
29  
30 Figure 2) with differences between the various groups.  
31  
32  
33

### 34 35 36 *Effect of denominator variation*

37  
38 Including or excluding women with pre-existing diabetes had little effect on GDM  
39  
40 prevalence rates overall (Table 2). Estimates were generally similar, albeit lower,  
41  
42 when considering only women in their first pregnancy (Supplementary Table 1).  
43  
44 Including or excluding women with pre-existing diabetes also had very little effect on  
45  
46 GDM prevalence rates by maternal region of birth (data not shown).  
47  
48  
49

### 50 51 **Discussion**

52  
53 Prevalence of both pre-existing diabetes in pregnancy and GDM increased in  
54  
55 Victoria, Australia over the period 1999 to 2008. The number of births to older  
56  
57  
58  
59  
60

1  
2  
3 mothers increased over the study period, almost doubling for those aged 40 years and  
4  
5 over. However, age-standardising had little effect on prevalence rates, and GDM  
6  
7 prevalence increased within most maternal age groups, indicating that rising maternal  
8  
9 age does not fully explain the upward trends. GDM prevalence increased to a greater  
10  
11 extent in pregnancies amongst Australian-born non-Indigenous women compared  
12  
13 with rates in all overseas-born women. Consistent with existing knowledge (20, 22,  
14  
15 23, 28-31), pregnancies occurring in women born throughout Asia and in North  
16  
17 Africa and the Middle East had the highest GDM rates.  
18  
19

20  
21 Similar to recent reports of rising trends in GDM burden nationally (20) and in the  
22  
23 multiethnic state of New South Wales (3, 23), we noted a pronounced increase in  
24  
25 overall GDM prevalence in Victoria from 1999 to 2008. This may reflect secular  
26  
27 increases in obesity prevalence in the general population (36); effects of obesity could  
28  
29 not be examined as maternal pre-pregnancy body mass index (BMI) was not recorded  
30  
31 in the VPDC during the study period. BMI trend data in Australian obstetric patients  
32  
33 are sparse and generally from single centers (37). Internationally, the extent to which  
34  
35 rising diabetes burden in pregnancy is explained by changing BMI distribution varies  
36  
37 (11, 17). Further research is required in the Australian context when population-level  
38  
39 obstetric BMI trend data become available.  
40  
41  
42  
43

44 Similar to reports from the United States, where diabetes rates among delivery  
45  
46 hospitalisations increased among mothers of all ages but most notably in younger  
47  
48 women (12), in our study GDM prevalence increased across most maternal age  
49  
50 groups. This and the fact that results were generally similar when restricting to  
51  
52 primiparous women indicates that factors other than those examined in this study  
53  
54 likely largely account for the observed trends. In the general Australian population,  
55  
56 prevalence of overweight/obesity has increased across most age groups over time (38)  
57  
58  
59  
60

1  
2  
3 and this may be contributing to the rising GDM prevalence observed in our study  
4  
5 among most groups including the younger mothers. Rising GDM prevalence may also  
6  
7 reflect increases in pre-existing but previously undiagnosed diabetes; as postnatal  
8  
9 OGTT results were not available, the extent to which this is the case cannot be  
10  
11 established. Additionally, GDM ascertainment may be influenced by systemic factors,  
12  
13 which themselves may change over time. In particular, screening and diagnostic  
14  
15 practices and uptake rates will influence case detection. For example, after  
16  
17 introduction of universal OGTT testing in a regional hospital in northern Australia,  
18  
19 testing rates in Indigenous Australian women increased from 31.4% in 2006 to 65.6%  
20  
21 in 2008 and GDM rates tripled (26).  
22  
23  
24

25  
26 This study has demonstrated that migrant disparities in GDM prevalence appear to be  
27  
28 diminishing, but in a concerning rather than desirable manner: increases in GDM  
29  
30 prevalence rates over time were most pronounced in Australian-born non-Indigenous  
31  
32 women, among whom GDM prevalence was converging with the higher rates in  
33  
34 overseas-born mothers. A similar phenomenon closing the gap in burden of diabetes  
35  
36 in pregnancy between high rate Indigenous and increasingly higher rate non-  
37  
38 Indigenous Australian women has also been previously described (20, 24). The  
39  
40 desired key to reducing overall disease burden and socio-cultural inequities is close  
41  
42 the gap by reducing prevalence among high risk groups and to contain and ideally  
43  
44 reduce the prevalence among lower risk groups. Our findings differ from recent  
45  
46 national reports that GDM increased to a similar extent amongst Australian-born  
47  
48 (23% increase) and all overseas-born mothers collectively (24% increase), with  
49  
50 differential increases between individual migrant groups, for the period 2000-01 and  
51  
52 2005-06 (20). That GDM burden in Victoria increased over time amongst all migrant  
53  
54 groups collectively but not individually may be due to the fact that the proportion of  
55  
56  
57  
58  
59  
60

1  
2  
3 mothers born in high prevalence regions and giving birth in Victoria has increased  
4  
5 over time (39), but our study may have been underpowered to detect differences  
6  
7 within individual migrant groups. Alternatively, it is possible that risk factor  
8  
9 distribution or screening uptake may have changed more over time for some groups  
10  
11 than others, or that there is a difference in the proportion of diagnosed to undiagnosed  
12  
13 diabetes between migrants and local-born women. Future research should seek to  
14  
15 confirm our results and investigate underlying causes.  
16  
17

18  
19 In contrast to earlier findings (3), recent work suggests that in the Australian obstetric  
20  
21 population, pre-existing type 2 diabetes is now as common as type 1 diabetes (2), and  
22  
23 even the predominant form of pre-existing diabetes in pregnancy (40). The increasing  
24  
25 number of pregnancies in women with pre-existing diabetes observed in our study is  
26  
27 consistent with international findings (7-9, 11, 12) and reinforces the urgent need for  
28  
29 population-level preventive initiatives to address the growing public health problem  
30  
31 of diabetes in the young. These upward trends are likely to continue, particularly in  
32  
33 the setting of the obesity and type 2 diabetes epidemics in the general population (36),  
34  
35 evidence of earlier onset of type 2 diabetes, trends toward delayed childbearing (39),  
36  
37 increasing use of assisted reproductive technologies by older women and/or those  
38  
39 with pre-existing diabetes and attendant subfertility, and introduction of new antenatal  
40  
41 screening guidelines (6, 32) that will increase case detection.  
42  
43  
44  
45

46  
47 There are a number of strengths to this study. This is one of few papers to report  
48  
49 secular trends in Australian population-level prevalence of pre-existing diabetes in  
50  
51 pregnancy (3) and to our knowledge, the only one to present data spanning a decade.  
52  
53 It is also one of few Australian studies, and the first from Victoria since the early  
54  
55 1990s, to report ethno-specific secular trends in GDM prevalence. This is important  
56  
57 because of Australia's diverse and evolving multi-ethnic demography. Others have  
58  
59  
60

1  
2  
3 reported their GDM prevalences after excluding pre-existing diabetes as sensitivity  
4  
5 analysis (19) but as far as we are aware, our paper is the first to specifically examine  
6  
7 using a single database the effect of including or excluding the growing group of  
8  
9 women with pre-existing diabetes on GDM prevalence estimates, in important  
10  
11 subgroups such as region of birth where denominator variation plausibly might have  
12  
13 an effect. This methodological issue is likely to become increasingly relevant, with  
14  
15 implications for service planning and delivery and preventive efforts worldwide.  
16  
17

18  
19 The data source was a comprehensive population-level perinatal data collection. Case  
20  
21 ascertainment depends on accurate completion of birth report forms - training  
22  
23 manuals exist to facilitate this. Data collection forms did not change over the study  
24  
25 period, with GDM and pre-existing diabetes status recorded consistently using  
26  
27 checkboxes; this reduces the likelihood of ascertainment bias over time.  
28  
29

30  
31 Study limitations should be noted. Australian guidelines over the study period  
32  
33 recommended universal screening for GDM, with selective screening to be considered  
34  
35 in settings with limited resources or low GDM burden (5). As it is not possible to  
36  
37 identify unscreened pregnancies in our data, all pregnancies yielding births that were  
38  
39 reported to the VPDC during the study period were included in this analysis. Some  
40  
41 women may not have been tested for GDM, so our rates are minimum estimates.  
42  
43 Screening practice may have varied between clinicians and centers. For example, in  
44  
45 1999 there was considerable variation in GDM testing in Australian hospitals,  
46  
47 including differences in the universal versus selective offer of screening and the  
48  
49 testing protocols used (41). Testing practices within centers may also have changed  
50  
51 over time (26). Finally, the region of birth classifications used in this study were  
52  
53 necessarily broad and may mask heterogeneity within and between groups.  
54  
55  
56  
57  
58  
59  
60



1  
2  
3 In summary, prevalence of both pre-existing diabetes and GDM increased among the  
4  
5 Victorian obstetric population between 1999 and 2008 and these increases are not  
6  
7 fully explained by rising maternal age. GDM prevalence increased at a greater rate  
8  
9 amongst Australian-born non-Indigenous women than among migrant women. These  
10  
11 findings have important implications across all levels of the healthcare system, from  
12  
13 the primary prevention sphere to pre-pregnancy counselling and antenatal clinical  
14  
15 service provision, through to postnatal management of both mother and infant and  
16  
17 tertiary prevention and monitoring. As such, these results have clear implications for  
18  
19 clinicians, who need to be aware of the socio-cultural distribution of GDM and  
20  
21 actively managing women at risk. This information is also important for  
22  
23 policymakers and the public health profession, both to guide preventive initiatives and  
24  
25 to facilitate health service planning in the face of an increasing morbidity burden for  
26  
27 mothers and offspring as prevalence of GDM and pre-existing diabetes increase.  
28  
29 Given the health risks conferred on infants of pregnancies complicated by diabetes,  
30  
31 addressing the rising burden of diabetes of any form in pregnancy is essential if we  
32  
33 are to break the cycle of intergenerational diabetes transmission and reverse the  
34  
35 direction and slope of trend graphs in future.  
36  
37  
38  
39

40  
41 Finally, there has been debate surrounding many aspects of GDM epidemiology, but  
42  
43 the issue of denominator variation is one that appears to have been overlooked, yet  
44  
45 warrants consideration. Although having negligible effect in our data set given low  
46  
47 rates of pre-existing diabetes, to include pre-existing diabetes in the denominator  
48  
49 could potentially underestimate GDM prevalence; to exclude pre-existing cases could  
50  
51 underestimate the total burden of diabetes in pregnancy. These issues should come to  
52  
53 the attention of expert groups: a consistent approach is required, in order to accurately  
54  
55 gauge disease burden, compare prevalence within and between populations, and  
56  
57  
58  
59  
60

1  
2  
3 monitor trends. Perhaps the best approach is to report prevalence of both GDM and  
4  
5 pre-existing diabetes separately. Particularly given the looming rise in diagnosed  
6  
7 cases of pre-existing disease, measurement methodology will increasingly matter.  
8  
9

### 10 11 12 13 **Contributors**

14  
15 MA conceived and designed the study, assisted with data analysis and interpretation,  
16  
17 wrote and edited manuscript; VV analysed and interpreted data, edited manuscript;  
18  
19 EDJ designed the study, edited manuscript; M.-A.D designed the study, analysed and  
20  
21 interpreted data, edited manuscript; BP conceived and designed the study, analysed  
22  
23 and interpreted data; JO edited manuscript; JD conceived and designed the study,  
24  
25 edited manuscript, supervised the study and is the guarantor.  
26  
27  
28  
29  
30

31  
32 Some findings from these data were presented as a poster at the 6th International  
33  
34 Symposium on Diabetes and Pregnancy conference in Salzburg, Austria in March  
35  
36 2011.  
37  
38  
39

40  
41 **Funding:** This research received no specific grant from any funding agency in the  
42  
43 public, commercial or not-for-profit sectors.

44  
45 **Competing interests:** none

46  
47 **Data sharing statement:** The statistical code used to generate the results in this article  
48  
49 is available from the corresponding author upon request. The custodian of the dataset  
50  
51 used in this article is the Consultative Council on Obstetric and Paediatric Mortality  
52  
53 and Morbidity (CCOPMM). All enquiries to access this dataset should be directed to  
54  
55 CCOPMM.  
56  
57  
58  
59  
60

## REFERENCES

1. Hodson K, Robson S, Taylor R. Gestational diabetes: emerging concepts in pathophysiology. *Obstetric Medicine*. 2010;3(4):128-32.
2. Australian Institute of Health and Welfare. Diabetes in pregnancy: its impact on Australian women and their babies. Diabetes series no. 14. Cat. no. CVD 52. Canberra: AIHW; 2010.
3. Shand AW, Bell JC, McElduff A, Morris J, Roberts CL. Outcomes of pregnancies in women with pre-gestational diabetes mellitus and gestational diabetes mellitus; a population-based study in New South Wales, Australia, 1998-2002. *Diabetic Medicine*. 2008;25:708-15.
4. McElduff A, Cheung NW, McIntyre HD, Lagstrom JA, Oats JN, Ross GP, et al. The Australasian Diabetes in Pregnancy Society consensus guidelines for the management of type 1 and type 2 diabetes in relation to pregnancy. *Medical Journal of Australia*. 2005;183(7):373-7.
5. Hoffman L, Nolan C, Wilson JD, Oats JN, Simmons D. Gestational diabetes mellitus -- management guidelines. The Australasian Diabetes in Pregnancy Society. *Medical Journal of Australia*. 1998;169(2):93-7.
6. Nankervis A, McIntyre HD, Moses R, Ross GP, Callaway L, Porter C, et al. Australasian Diabetes in Pregnancy Society (ADIPS) consensus guidelines for the testing and diagnosis of gestational diabetes mellitus in Australia. 2013.
7. Lawrence JM, Contreras R, Chen W, Sacks DA. Trends in the prevalence of preexisting diabetes and gestational diabetes mellitus among a racially/ethnically diverse population of pregnant women, 1999-2005. *Diabetes Care*. 2008;31(5):899-904.
8. Bell R, Bailey K, Cresswell T, Hawthorne G, Critchley J, Lewis-Barned N, et al. Trends in prevalence and outcomes of pregnancy in women with pre-existing type I and type II diabetes. *BJOG: An International Journal of Obstetrics & Gynaecology*. 2008;115(4):445-52.
9. Thorpe LE, Berger D, Ellis JA, Bettgowda VR, Brown G, Matte T, et al. Trends and racial/ethnic disparities in gestational diabetes among pregnant women in New York City, 1990-2001. *Am J Public Health*. 2005 Sep;95(9):1536-9.
10. Falhammar H, Davis B, Bond D, Sinha AK. Maternal and neonatal outcomes in the Torres Strait Islands with a sixfold increase in type 2 diabetes in pregnancy over six years. *Aust N Z J Obstet Gynaecol*. 2010;50:120-6.
11. Davenport MH, Campbell MK, Mottola MF. Increased incidence of glucose disorders during pregnancy is not explained by pre-pregnancy obesity in London, Canada. *BMC Pregnancy and Childbirth*. 2010;10:85.
12. Albrecht SS, Kuklina EV, Bansil P, Jamieson DJ, Whiteman MK, Kourtis AP, et al. Diabetes trends among delivery hospitalisations in the U.S., 1994-2004. *Diabetes Care*. 2010;33(4):768-73.
13. Aljohani N, Rempel BM, Ludwig S, Morris M, McQuillen K, Cheang M, et al. Gestational diabetes in Manitoba during a twenty-year period. *Clin Invest Med*. 2008;31(3):E131-E7.
14. Zhang F, Dong L, Zhang CP, Li B, Wen J, Gao W, et al. Increasing prevalence of gestational diabetes mellitus in Chinese women from 1999 to 2008. *Diabetic Medicine*. 2011;28(6):652-7.
15. Rajab KE, Issa AA, Hasan ZA, Rajab E, Jaradat AA. Incidence of gestational diabetes mellitus in Bahrain from 2002 to 2010. *International Journal of Gynecology & Obstetrics*. 2012;117(1):74-7.
16. Getahun D, Nath C, Ananth CV, Chavez MR, Smulian JC. Gestational diabetes in the United States: temporal trends 1989 through 2004. *American Journal of Obstetrics & Gynecology*. 2008;198(5).

17. Lu GC, Rouse DJ, DuBard M, Cliver SP, Kimberlin D, Hauth JC. The effect of the increasing prevalence of maternal obesity on perinatal morbidity. *American Journal of Obstetrics & Gynecology*. 2001;185(4):845-9.
18. Ferrara A, Kahn HS, Quesenberry CP, Riley C, Hedderon MM. An increase in the incidence of gestational diabetes mellitus: Northern California, 1991-2000. *Obstet Gynecol*. 2004 Mar;103(3):526-33.
19. Wang Y, Chen L, Xiao K, Horswell R, Besse J, Johnson J, et al. Increasing incidence of gestational diabetes mellitus in Louisiana, 1997-2009. *Journal of Women's Health*. 2011.
20. Templeton M, Pieris-Caldwell I. Gestational diabetes mellitus in Australia, 2005-06. Diabetes series no. 10. Cat. no. CVD 44. Canberra: AIHW; 2008.
21. Henry OA, Beischer NA, Sheedy MT, Walstab JE. Gestational diabetes and follow-up among immigrant Vietnam-born women. *The Australian and New Zealand Journal of Obstetrics and Gynaecology*. 1993;33(2):109-14.
22. Beischer NA, Oats JN, Henry OA, Sheedy MT, Walstab JE. Incidence and severity of gestational diabetes mellitus according to country of birth in women living in Australia. *Diabetes*. 1991;2:35-8.
23. Anna V, van der Ploeg HP, Wah Cheung N, Huxley RR, Bauman AE. Sociodemographic correlates of the increasing trend in prevalence of gestational diabetes mellitus in a large population of women between 1995 and 2005. *Diabetes Care*. 2008;31(12):2288-93.
24. Ishak M, Petocz P. Gestational diabetes among Aboriginal Australians: prevalence, time trend and comparisons with non-Aboriginal Australians. *Ethnicity and Disease*. 2003;13(Winter 2003):55-60.
25. Kim SY, Humphrey MD. Decrease in incidence of gestational diabetes mellitus in Far North Queensland between 1992 and 1996. *Aust NZ J Obstet Gynaecol*. 1999;39(1):40-3.
26. Davis B, McLean A, Sinha AK, Falhammar H. A threefold increase in gestational diabetes over two years: Review of screening practices and pregnancy outcomes in Indigenous women of Cape York, Australia. *Australian and New Zealand Journal of Obstetrics and Gynaecology*. 2013;53:363-8.
27. Ferrara A. Increasing prevalence of gestational diabetes mellitus. A public health perspective. *Diabetes Care*. 2007;30(S2):S141-S6.
28. Carolan M, Davey M-A, Biro MA, Kealy M. Maternal age, ethnicity and gestational diabetes mellitus. *Midwifery*. 2011(0).
29. Stone CA, McLachlan KA, Halliday JL, Wein P, Tippett C. Gestational diabetes in Victoria in 1996: incidence, risk factors and outcomes. *Medical Journal of Australia*. 2002;177:486-91.
30. Teh WT, Teede HJ, Paul E, Harrison CL, Wallace EM, Allan C. Risk factors for gestational diabetes mellitus: Implications for the application of screening guidelines. *Australian and New Zealand Journal of Obstetrics and Gynaecology*. 2011;51:26-30.
31. Moses RG, Griffiths RD, McPherson S. The incidence of gestational diabetes mellitus in the Illawarra area of New South Wales. *Australian & New Zealand Journal of Obstetrics & Gynaecology*. 1994;34(4):425-7.
32. International Association of Diabetes in Pregnancy Study Groups Consensus Panel. International Association of Diabetes and Pregnancy Study Groups Recommendations on the Diagnosis and Classification of Hyperglycemia in Pregnancy. *Diabetes Care*. 2010 March 1, 2010;33(3):676-82.
33. Moses RG, Morris GJ, Petocz P, San Gil F, Garg D. The impact of potential new diagnostic criteria on the prevalence of gestational diabetes mellitus in Australia. *Medical Journal of Australia*. 2011;194(7):338-40.
34. McIntyre HD. Diagnosing gestational diabetes mellitus: rationed or rationally related to risk? *Diabetes Care*. 2013;36(10):2879-80.

- 1
- 2
- 3 35. Davey M-A, Sloan M-L, Palma S, Riley M, King J. Methodological processes in
- 4 validating and analysing the quality of population-based data: a case study using the
- 5 Victorian Perinatal Data Collection. *Health Information Management Journal*. 2013;42(3):12-
- 6 9.
- 7 36. Department of Health Victoria. Victorian population health survey 2009. Available
- 8 from: <http://www.health.vic.gov.au/healthstatus/survey/vphs2009.htm>.
- 9 37. McIntyre HD, Gibbons KS, Flenady VJ, Callaway LK. Overweight and obesity in
- 10 Australian mothers: epidemic or endemic? *Medical Journal of Australia*. 2012;196(3):184-8.
- 11 38. Australian Institute of Health and Welfare. Risk factor trends: age patterns in key
- 12 health risks over time. Cat. no. PHE 166. Canberra: AIHW 2012.
- 13 39. Consultative Council on Obstetric and Paediatric Mortality and Morbidity. Births in
- 14 Victoria 2007 and 2008. Melbourne: Department of Health 2010.
- 15 40. McElduff A, Ross GP, Lagstrom JA, Champion B, Flack JR, Lau S-L, et al. Pregestational
- 16 diabetes and pregnancy. An Australian experience. *Diabetes Care*. 2005;28(5):1260.
- 17 41. Rumbold AR, Crowther CA. Guideline use for gestational diabetes mellitus and
- 18 current screening, diagnostic and management practices in Australian hospitals. *Australian*
- 19 *and New Zealand Journal of Obstetrics and Gynaecology*. 2001;41(1):86-90.
- 20
- 21
- 22
- 23
- 24
- 25
- 26
- 27
- 28
- 29
- 30
- 31
- 32
- 33
- 34
- 35
- 36
- 37
- 38
- 39
- 40
- 41
- 42
- 43
- 44
- 45
- 46
- 47
- 48
- 49
- 50
- 51
- 52
- 53
- 54
- 55
- 56
- 57
- 58
- 59
- 60

**Table 1: Maternal demographic characteristics for pregnancies yielding births notified to the Victorian Perinatal Data Collection by year of delivery, Victoria 1999-2008.\***

|                                    | Year of delivery |        |        |        |        |        |        |        |        |        | Total<br>1999-2008 |
|------------------------------------|------------------|--------|--------|--------|--------|--------|--------|--------|--------|--------|--------------------|
|                                    | 1999             | 2000   | 2001   | 2002   | 2003   | 2004   | 2005   | 2006   | 2007   | 2008   |                    |
| <b>Maternal age group (N)</b>      |                  |        |        |        |        |        |        |        |        |        |                    |
| <=24 years                         | 9768             | 9363   | 9270   | 9152   | 8903   | 8644   | 8895   | 9445   | 9619   | 9762   | 92821              |
| 25-29 years                        | 19074            | 18537  | 17283  | 16535  | 16241  | 15740  | 16213  | 16739  | 17652  | 17583  | 171597             |
| 30-34 years                        | 20485            | 20957  | 21667  | 22615  | 23050  | 23119  | 23748  | 24447  | 24475  | 24021  | 228584             |
| 35-39 years                        | 9456             | 9839   | 9895   | 10563  | 10796  | 11534  | 12765  | 13859  | 15137  | 15420  | 119264             |
| >=40 years                         | 1641             | 1731   | 1879   | 1981   | 2117   | 2241   | 2393   | 2658   | 2854   | 3139   | 22634              |
| <b>Total</b>                       | 60424            | 60427  | 59994  | 60846  | 61107  | 61278  | 64014  | 67148  | 69737  | 69925  | 634900             |
| <b>% aged &gt;30</b>               | 52.27            | 53.83  | 55.74  | 57.78  | 58.85  | 60.21  | 60.78  | 61.01  | 60.89  | 60.89  | 58.33              |
| <b>Parity</b>                      |                  |        |        |        |        |        |        |        |        |        |                    |
| 1                                  | 24,879           | 25,242 | 24,662 | 25,511 | 26,015 | 26,328 | 27,568 | 29,024 | 30,066 | 30,362 | 269,657            |
| 2 or higher                        | 35,545           | 35,185 | 35,332 | 35,335 | 35,091 | 34,950 | 36,446 | 38,124 | 39,671 | 39,563 | 365,242            |
| <b>Region of birth<sup>†</sup></b> |                  |        |        |        |        |        |        |        |        |        |                    |
| Australia (non-Indigenous)         | 45,573           | 45,258 | 45,236 | 46,076 | 46,014 | 45,985 | 47,715 | 49,764 | 50,342 | 50,042 | 472,005            |
| Oceania                            | 1,496            | 1,488  | 1,626  | 1,566  | 1,663  | 1,636  | 1,685  | 1,838  | 1,846  | 1,974  | 16,818             |
| North-West Europe                  | 2,565            | 2,438  | 2,353  | 2,275  | 2,134  | 2,127  | 2,156  | 2,250  | 2,400  | 2,213  | 22,911             |
| Southern & Eastern Europe          | 1,821            | 1,700  | 1,595  | 1,527  | 1,611  | 1,440  | 1,468  | 1,477  | 1,562  | 1,451  | 15,652             |
| North Africa & Middle East         | 1,630            | 1,573  | 1,537  | 1,581  | 1,669  | 1,684  | 1,889  | 1,979  | 1,997  | 2,146  | 17,685             |
| South-East Asia                    | 3,234            | 3,667  | 3,304  | 3,364  | 3,506  | 3,419  | 3,427  | 3,598  | 4,053  | 4,113  | 35,685             |
| North-East Asia                    | 1,158            | 1,256  | 1,080  | 1,125  | 1,061  | 1,122  | 1,148  | 1,305  | 1,691  | 1,704  | 12,650             |
| Southern & Central Asia            | 1,125            | 1,184  | 1,194  | 1,228  | 1,346  | 1,512  | 1,793  | 2,195  | 2,675  | 3,251  | 17,503             |
| Americas                           | 651              | 693    | 721    | 734    | 691    | 744    | 806    | 840    | 864    | 846    | 7,590              |
| Sub-Saharan Africa                 | 708              | 765    | 863    | 854    | 905    | 990    | 1,152  | 1,145  | 1,260  | 1,248  | 9,890              |
| Australia (Indigenous)             | 397              | 325    | 358    | 366    | 326    | 394    | 463    | 501    | 628    | 658    | 4,416              |

\* Includes women who had more than one pregnancy during the study period; 32 births had no information on age of mother and one birth had no information on parity

† Of the 634,932 registered births 2127 recorded the maternal region of birth as unknown.

**Table 2: Crude and age-standardised prevalence of GDM by year of delivery and denominator, Victoria 1999-2008**

| Year | <i>n</i><br>(all births) | <i>n</i><br>(GDM) | GDM /all pregnancies (%) |                  | GDM/all pregnancies less<br>pre-existing (%) |                       | All forms of diabetes in<br>pregnancy (%) |                  |
|------|--------------------------|-------------------|--------------------------|------------------|----------------------------------------------|-----------------------|-------------------------------------------|------------------|
|      |                          |                   | Crude                    | Age-standardised | Crude                                        | Age-<br>standardised* | Crude                                     | Age-standardised |
| 1999 | 60424                    | 2356              | 3.90                     | 4.10 (3.94-4.26) | 3.91                                         | 4.11 (3.95-4.28)      | 4.27                                      | 4.48 (4.31-4.65) |
| 2000 | 60431                    | 2548              | 4.22                     | 4.38 (4.21-4.55) | 4.23                                         | 4.39 (4.23-4.56)      | 4.56                                      | 4.73 (4.56-4.90) |
| 2001 | 59997                    | 2593              | 4.32                     | 4.43 (4.26-4.60) | 4.34                                         | 4.45 (4.28-4.61)      | 4.71                                      | 4.82 (4.65-5.00) |
| 2002 | 60847                    | 2752              | 4.52                     | 4.58 (4.41-4.74) | 4.54                                         | 4.59 (4.43-4.76)      | 4.95                                      | 5.00 (4.83-5.18) |
| 2003 | 61111                    | 2611              | 4.27                     | 4.29 (4.13-4.46) | 4.29                                         | 4.31 (4.15-4.47)      | 4.71                                      | 4.73 (4.56-4.90) |
| 2004 | 61283                    | 2547              | 4.16                     | 4.13 (3.97-4.29) | 4.17                                         | 4.15 (3.99-4.31)      | 4.61                                      | 4.58 (4.42-4.75) |
| 2005 | 64022                    | 3027              | 4.73                     | 4.66 (4.50-4.83) | 4.75                                         | 4.69 (4.52-4.85)      | 5.24                                      | 5.17 (5.00-5.34) |
| 2006 | 67150                    | 3295              | 4.91                     | 4.82 (4.66-4.98) | 4.93                                         | 4.85 (4.69-5.01)      | 5.43                                      | 5.34 (5.17-5.51) |
| 2007 | 69738                    | 3559              | 5.10                     | 4.98 (4.82-5.14) | 5.13                                         | 5.01 (4.85-5.17)      | 5.67                                      | 5.53 (5.37-5.70) |
| 2008 | 69929                    | 3859              | 5.52                     | 5.37 (5.21-5.54) | 5.55                                         | 5.40 (5.24-5.57)      | 6.12                                      | 5.96 (5.78-6.13) |

\* Age-standardised to the age structure of the entire study population for the ten year period, excluding those with pre-existing diabetes

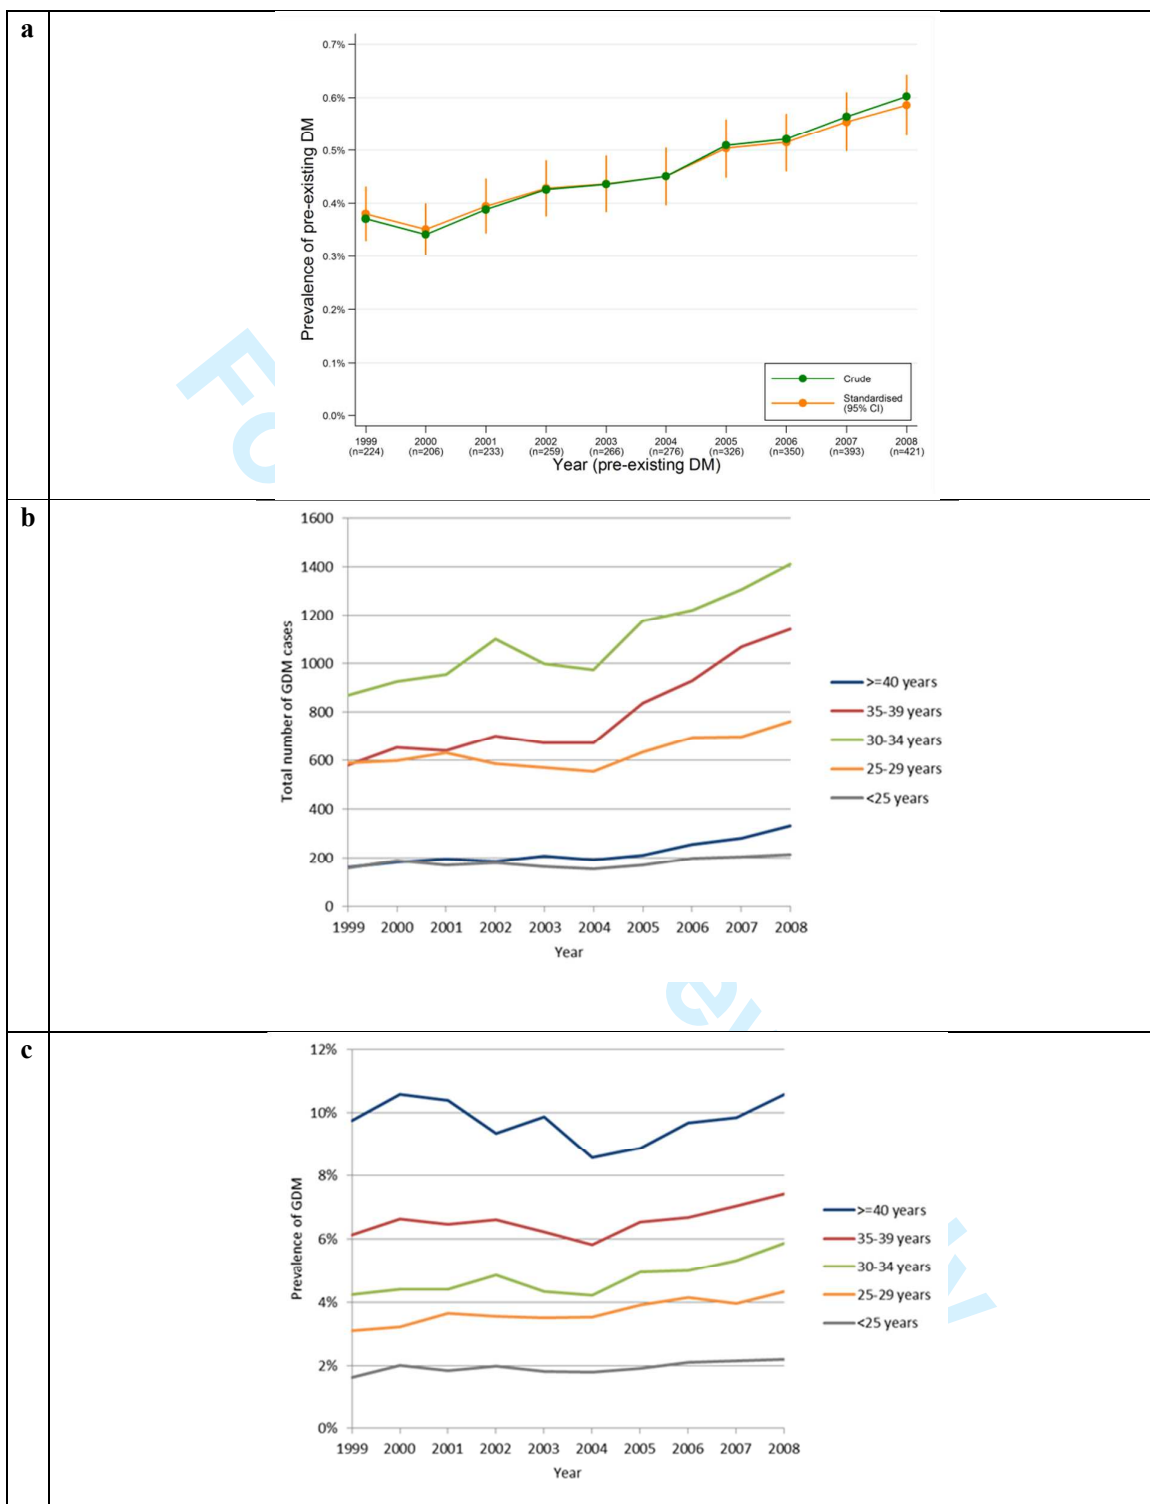

**Figure 1: (a) Crude and age-standardised prevalence of pre-existing maternal diabetes in pregnancy by year of delivery, Victoria 1999-2008; (b) Crude number of GDM cases by year of delivery and maternal age group, Victoria 1999-2008; (c) Crude GDM prevalence rates\* by year of delivery and maternal age group, Victoria 1999-2008.**

\* the denominator used to calculate prevalence of GDM is all pregnancies



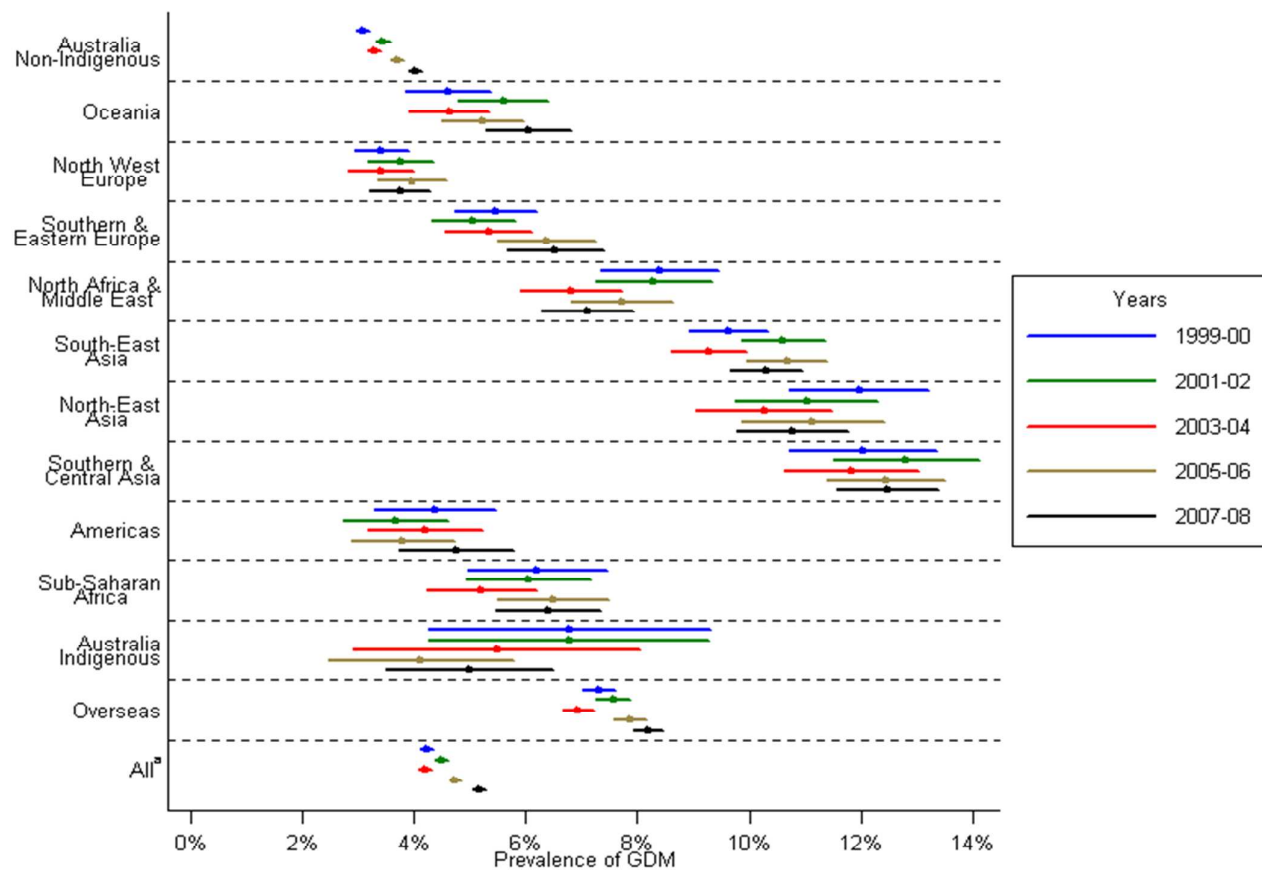

**Fig. 2: Age-standardised GDM prevalence rates\* by maternal region of birth and year of delivery, Victoria 1999-2008**

\* the denominator used to calculate prevalence of GDM is all pregnancies

1  
2  
3  
4  
5  
6  
7  
8  
9  
10  
11  
12  
13  
14  
15  
16  
17  
18  
19  
20  
21  
22  
23  
24  
25  
26  
27  
28  
29  
30  
31  
32  
33  
34  
35  
36  
37  
38  
39  
40  
41  
42  
43  
44  
45  
46  
47  
48  
49  
50  
51  
52  
53  
54  
55  
56  
57  
58  
59  
60

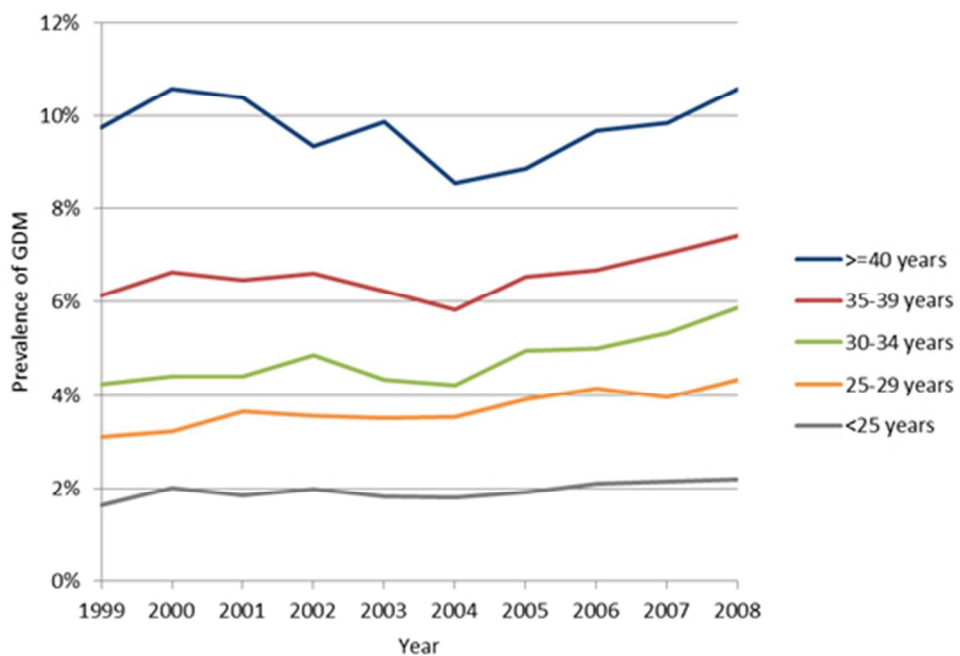

review only

1  
2  
3  
4  
5  
6  
7  
8  
9  
10  
11  
12  
13  
14  
15  
16  
17  
18  
19  
20  
21  
22  
23  
24  
25  
26  
27  
28  
29  
30  
31  
32  
33  
34  
35  
36  
37  
38  
39  
40  
41  
42  
43  
44  
45  
46  
47  
48  
49  
50  
51  
52  
53  
54  
55  
56  
57  
58  
59  
60

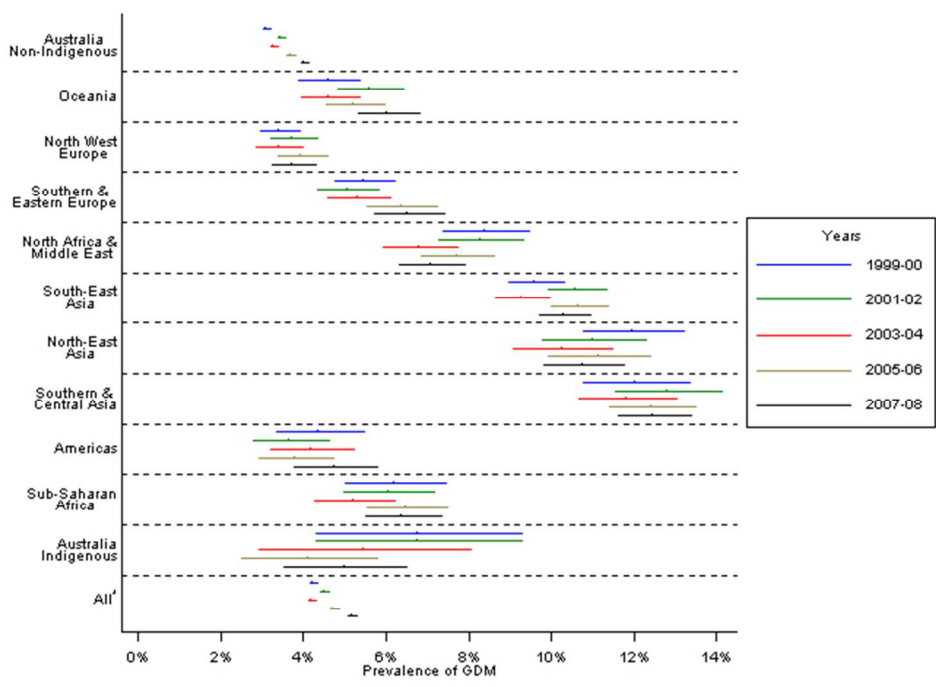

242x175mm (72 x 72 DPI)

View only

1  
2  
3  
4  
5  
6  
7  
8  
9  
10  
11  
12  
13  
14  
15  
16  
17  
18  
19  
20  
21  
22  
23  
24  
25  
26  
27  
28  
29  
30  
31  
32  
33  
34  
35  
36  
37  
38  
39  
40  
41  
42  
43  
44  
45  
46  
47  
48  
49

**SUPPLEMENTARY TABLE 1: Crude and age-standardised prevalence of GDM by year of delivery and denominator among women in their first pregnancy, Victoria 1999-2008**

| Year | n<br>(all births) | n<br>(GDM) | GDM /all first pregnancies (%) |                  | GDM/all first pregnancies less those in women with pre-existing diabetes (%) |                   | All forms of diabetes in pregnancy (%) |                  |
|------|-------------------|------------|--------------------------------|------------------|------------------------------------------------------------------------------|-------------------|----------------------------------------|------------------|
|      |                   |            | Crude                          | Age-standardised | Crude                                                                        | Age-standardised* | Crude                                  | Age-standardised |
| 1999 | 24879             | 908        | 3.65                           | 4.24 (3.95-4.53) | 3.66                                                                         | 4.26 (3.96-4.55)  | 4.00                                   | 4.62 (4.31-4.92) |
| 2000 | 25243             | 988        | 3.91                           | 4.57 (4.27-4.87) | 3.93                                                                         | 4.57 (4.28-4.88)  | 4.22                                   | 4.90 (4.60-5.21) |
| 2001 | 24664             | 965        | 3.91                           | 4.42 (4.13-4.71) | 3.93                                                                         | 4.44 (4.15-4.73)  | 4.27                                   | 4.81 (4.51-5.11) |
| 2002 | 25512             | 1105       | 4.33                           | 4.78 (4.49-5.07) | 4.35                                                                         | 4.78 (4.51-5.09)  | 4.75                                   | 5.24 (4.94-5.54) |
| 2003 | 26019             | 1057       | 4.06                           | 4.44 (4.17-4.71) | 4.08                                                                         | 4.47 (4.19-4.74)  | 4.53                                   | 4.95 (4.66-5.23) |
| 2004 | 26332             | 1027       | 3.90                           | 4.27 (3.96-4.48) | 3.91                                                                         | 4.24 (3.98-4.50)  | 4.30                                   | 4.62 (4.35-4.89) |
| 2005 | 27575             | 1191       | 4.32                           | 4.66 (4.40-4.92) | 4.34                                                                         | 4.68 (4.42-4.95)  | 4.85                                   | 5.22 (4.94-5.50) |
| 2006 | 29026             | 1364       | 4.70                           | 5.02 (4.75-5.28) | 4.72                                                                         | 5.04 (4.78-5.31)  | 5.17                                   | 5.52 (5.24-5.79) |
| 2007 | 30067             | 1513       | 5.03                           | 5.39 (5.12-5.66) | 5.06                                                                         | 5.42 (5.15-5.69)  | 5.51                                   | 5.89 (5.61-6.17) |
| 2008 | 30365             | 1645       | 5.41                           | 5.81 (5.53-6.08) | 5.44                                                                         | 5.84 (5.56-6.11)  | 5.91                                   | 6.32 (6.03-6.60) |

\* Age-standardised to the age structure of the Victorian population for the ten year period, excluding those with pre-existing diabetes

# BMJ Open

## A population-based observational study of diabetes during pregnancy in Victoria, Australia, 1999-2008

|                                 |                                                                                                                                                                                                                                                                                                                                                                                                                                                                                                                                                                                                                                                                                                                                                                                                                                                                                                                                                                                                                                             |
|---------------------------------|---------------------------------------------------------------------------------------------------------------------------------------------------------------------------------------------------------------------------------------------------------------------------------------------------------------------------------------------------------------------------------------------------------------------------------------------------------------------------------------------------------------------------------------------------------------------------------------------------------------------------------------------------------------------------------------------------------------------------------------------------------------------------------------------------------------------------------------------------------------------------------------------------------------------------------------------------------------------------------------------------------------------------------------------|
| Journal:                        | <i>BMJ Open</i>                                                                                                                                                                                                                                                                                                                                                                                                                                                                                                                                                                                                                                                                                                                                                                                                                                                                                                                                                                                                                             |
| Manuscript ID:                  | bmjopen-2014-005394.R1                                                                                                                                                                                                                                                                                                                                                                                                                                                                                                                                                                                                                                                                                                                                                                                                                                                                                                                                                                                                                      |
| Article Type:                   | Research                                                                                                                                                                                                                                                                                                                                                                                                                                                                                                                                                                                                                                                                                                                                                                                                                                                                                                                                                                                                                                    |
| Date Submitted by the Author:   | 22-Sep-2014                                                                                                                                                                                                                                                                                                                                                                                                                                                                                                                                                                                                                                                                                                                                                                                                                                                                                                                                                                                                                                 |
| Complete List of Authors:       | Abouzeid, Marian; Monash University, Department of Epidemiology and Preventive Medicine<br>Versace, Vincent; Flinders and Deakin Universities, Greater Green Triangle University Department of Rural Health<br>Janus, Edward; Department of Medicine, NorthWest Academic Centre, The University of Melbourne, Western Hospital, ; Flinders and Deakin Universities, Greater Green Triangle University Department of Rural Health<br>Davey, Mary-Ann; Department of Health, Consultative Council on Obstetric and Paediatric Mortality and Morbidity, Clinical Councils Unit; La Trobe University, Judith Lumley Centre<br>Philpot, Ben; Greater Green Triangle University Department of Rural Health, Flinders and Deakin Universities,<br>Oats, Jeremy; Department of Health, Consultative Council on Obstetric and Paediatric Mortality and Morbidity, Clinical Councils Unit; The University of Melbourne, Melbourne School of Population and Global Health<br>Dunbar, James; Flinders University, GGT UDRH; Deakin University, GGT UDRH |
| <b>Primary Subject Heading</b>: | Diabetes and endocrinology                                                                                                                                                                                                                                                                                                                                                                                                                                                                                                                                                                                                                                                                                                                                                                                                                                                                                                                                                                                                                  |
| Secondary Subject Heading:      | Diabetes and endocrinology, Public health                                                                                                                                                                                                                                                                                                                                                                                                                                                                                                                                                                                                                                                                                                                                                                                                                                                                                                                                                                                                   |
| Keywords:                       | Diabetes in pregnancy < DIABETES & ENDOCRINOLOGY, PREVENTIVE MEDICINE, PUBLIC HEALTH                                                                                                                                                                                                                                                                                                                                                                                                                                                                                                                                                                                                                                                                                                                                                                                                                                                                                                                                                        |
|                                 |                                                                                                                                                                                                                                                                                                                                                                                                                                                                                                                                                                                                                                                                                                                                                                                                                                                                                                                                                                                                                                             |

SCHOLARONE™  
Manuscripts

1  
2  
3 **A population-based observational study of diabetes during pregnancy in**  
4 **Victoria, Australia, 1999-2008**  
5  
6

7 **Running title: Secular trends in prevalence of diabetes in pregnancy**  
8

9 **Marian Abouzeid<sup>1,2</sup>, Vincent L Versace<sup>1</sup>, Edward D Janus<sup>1,3</sup>, Mary-Ann Davey<sup>4,5</sup>,**  
10 **Benjamin Philpot<sup>1</sup>, Jeremy Oats<sup>4,6</sup>, James A Dunbar<sup>1</sup>**  
11

- 12 1. Greater Green Triangle University Department of Rural Health  
13 Flinders and Deakin Universities  
14 Warrnambool, Victoria, Australia
  - 15 2. Department of Epidemiology and Preventive Medicine  
16 Monash University  
17 Victoria, Australia
  - 18 3. Department of Medicine, Northwest Academic Centre  
19 The University of Melbourne and Western Health  
20 Victoria, Australia
  - 21 4. Consultative Council on Obstetric and Paediatric Mortality and Morbidity, Clinical  
22 Councils Unit  
23 Department of Health  
24 Victoria, Australia
  - 25 5. Judith Lumley Centre  
26 La Trobe University  
27 Victoria, Australia
  - 28 6. Melbourne School of Population and Global Health  
29 The University of Melbourne  
30 Victoria, Australia
- 31  
32  
33  
34  
35  
36  
37  
38

39 **Corresponding author**

40 Professor James Dunbar  
41 Greater Green Triangle University Department of Rural Health  
42 Flinders and Deakin Universities  
43 P.O Box 423, Warrnambool 3280  
44 Victoria, Australia  
45 PH: +61 3 5563 3504  
46 Fax: +61 3 5563 3144  
47 Email: [director@greaterhealth.org](mailto:director@greaterhealth.org)  
48  
49  
50  
51  
52  
53  
54  
55  
56  
57  
58  
59  
60

## Abstract

**Objectives:** This paper reports secular trends in diabetes in pregnancy in Victoria, Australia and examines the effect of including or excluding women with pre-existing diabetes on gestational diabetes (GDM) prevalence estimates.

**Design:** population-based observational study

**Setting:** all births in Victoria, Australia between 1999 and 2008

**Participants:** 634,932 pregnancies resulting in a birth registered with the Victorian Perinatal Data Collection

**Outcome measures:** crude and age-standardised secular trends in pre-existing diabetes and GDM prevalence; secular GDM trends by maternal birthplace; effects on GDM prevalence of including and excluding pre-existing diabetes from the denominator.

**Results:** Of the 634,932 pregnancies, 2954 (0.5%) occurred in women with pre-existing diabetes and 29,147 (4.6%) were complicated by GDM. Mean maternal age increased from 29.7 years in 1999 to 30.8 years in 2008. GDM prevalence increased in most maternal age groups. In 2008, age-standardised GDM prevalence was 31% higher than in 1999; secular increases were greater for Australian-born non-Indigenous (29% increase) than immigrant women (12.3% increase). The annual number of pregnancies in women with pre-existing diabetes almost doubled from 1999 to 2008 and prevalence increased from 0.4% to 0.6%. However including or excluding pre-existing diabetes had little effect on GDM prevalence estimates.

**Conclusions:** Pre-existing diabetes and GDM prevalence increased in Victoria between 1999 and 2008 and rising maternal age does not fully explain these trends. These findings have important implications for preventive initiatives. Including or excluding small numbers of women with pre-existing diabetes resulted in minimal changes in GDM estimates. As pre-

1  
2  
3 existing diabetes in young women increases, this methodological issue will likely become  
4  
5 important.  
6  
7  
8  
9  
10

### 11 12 13 14 15 16 **Strengths and limitations of this study**

- 17  
18 • This study reports secular trends in Australian population-level prevalence of pre-existing  
19  
20 diabetes in pregnancy and GDM using data collected over ten years from a  
21  
22 comprehensive perinatal database that captures virtually all births in the state. Recording  
23  
24 of GDM and pre-existing diabetes in this database have been shown to be highly accurate.  
25  
26
- 27  
28 • This paper also examines an important epidemiological issue of the effect of including or  
29  
30 excluding the growing group of women with pre-existing diabetes on GDM prevalence  
31  
32 estimates. This methodological consideration is likely to become increasingly important  
33  
34 as the number of women with pre-existing diabetes increases.  
35  
36
- 37  
38 • As this study uses population-level administrative data it is not possible to identify  
39  
40 unscreened pregnancies and screening practice may have changed over time.  
41  
42  
43  
44  
45  
46  
47  
48  
49  
50  
51  
52  
53  
54  
55  
56  
57  
58  
59  
60



## Introduction

True pregnancy-induced hyperglycemia differs from pre-existing maternal diabetes. Pregnancy is diabetogenic: insulin resistance increases with advancing gestation. Maternal insulin secretion normally increases in response; if insufficient to overcome the insulin resistance, hyperglycemia occurs. Pre-pregnancy glycaemic control is usually restored after delivery (1). This differs from pre-existing maternal type 1 and type 2 diabetes, which are neither induced by pregnancy nor resolve post-partum. Any form of diabetes in pregnancy increases risk of a range of adverse maternal and neonatal outcomes; risk of some such complications is greater with pre-existing diabetes (2, 3). Moreover, pre-existing maternal diabetes in pregnancy presents particular management issues (4).

By definition, gestational diabetes mellitus (GDM) describes glucose intolerance that begins or is first recognised during pregnancy (5). Therefore, GDM encompasses both true pregnancy-induced hyperglycemia and diabetes pre-dating pregnancy but previously undiagnosed. Pre-existing diabetes is confirmed if post-partum testing demonstrates persistent dysglycemia fulfilling non-pregnancy diagnostic thresholds for diabetes (6). However, antenatal records and birth reports, commonly used to ascertain GDM prevalence, are completed before these tests are conducted and their results known.

Prevalence of diagnosed pre-existing diabetes among pregnant women is generally increasing (3, 7-12). Recent secular increases in GDM burden have also been documented in Manitoba (13) and Ontario, Canada (11), Tianjin, China (14) and Bahrain (15). From across the United States there are reports of increasing GDM (9, 12, 16, 17), increases followed by a levelling off (18), no temporal changes (7) and fluctuations in disease burden over time (19). In Australia, over recent decades rising GDM burden has been reported (3, 20-23); trends in

1  
2  
3 diabetes in pregnancy amongst Indigenous Australian women are inconsistent (10, 20, 24-  
4  
5 26).

6  
7  
8 There are several methodological issues surrounding GDM epidemiology, including  
9  
10 denominator selection (27). For example, Australian GDM studies have included in the  
11  
12 denominator all pregnant women/births/confinements (2, 3, 10, 20, 24-26, 28), only singleton  
13  
14 pregnancies (29, 30), only screened/tested pregnancies (22, 31), excluded women with pre-  
15  
16 existing diabetes (23, 30) and/or reported prevalence of all forms of diabetes in pregnancy  
17  
18 collectively (10, 24, 26). Similar methodological variation exists internationally.  
19  
20  
21

22 The International Association of Diabetes and Pregnancy Study Group (IADPSG) recognises  
23  
24 the issues associated with including women with pre-existing diabetes together with those  
25  
26 with 'true' GDM (32). New IADPSG recommendations advise that all or high-risk women  
27  
28 without known glucose abnormalities undergo fasting plasma glucose (FPG), random plasma  
29  
30 glucose (RPG) or hemoglobin A1c (HbA1c) testing at the first antenatal visit. This is to  
31  
32 identify 'overt' diabetes (FPG  $\geq 7.0$ mmol/L or HbA1c  $\geq 6.5\%$  or random plasma glucose  
33  
34  $\geq 11.1$ mmol/L and confirmed with FPG or HbA1c result) and early-onset GDM (32). The  
35  
36 Australasian Diabetes in Pregnancy Society (ADIPS) recommends that high-risk women have  
37  
38 a 75g oral glucose tolerance test (OGTT) as soon as possible after conception to detect GDM  
39  
40 (6). Both authorities recommend universal testing of remaining women using OGTT at 24-28  
41  
42 weeks to identify additional cases (6, 32). The FPG level considered diagnostic of GDM will  
43  
44 be reduced from  $\geq 5.5$ mmol/L to  $\geq 5.1$ mmol/L, and the two-hour plasma glucose threshold is  
45  
46 to increase from  $\geq 8.0$ mmol/L to  $\geq 8.5$ mmol/L (6). These guidelines are expected to  
47  
48 substantially increase the number of women diagnosed with GDM (33). The IADPSG and  
49  
50 ADIPS diagnostic criteria recommend dispensing with the Glucose Challenge Test (GCT).  
51  
52 The GCT misses 25% of GDM cases and consequently adoption of this step alone is likely to  
53  
54 be a significant contributor to the increased diagnostic rates of GDM (34). The IADPSG  
55  
56  
57  
58  
59  
60

1  
2  
3 recommendations are also intended to increase detection of pre-existing diabetes. As  
4  
5 diagnosed pre-existing diabetes rises, the methodology used to calculate GDM prevalence  
6  
7 may influence the estimates due to differing denominator sizes, particularly amongst ethnic  
8  
9 groups and in settings where pre-existing diabetes prevalence is high. Such variation has a  
10  
11 range of potential implications, including for funding and health service planning.  
12  
13

14  
15 No recent population-level Australian studies examine longitudinal trends in pre-existing  
16  
17 maternal diabetes (3), and few report recent trends in burden of GDM overall (20, 23) or  
18  
19 among various migrant groups (20). Using data routinely collected over ten years from the  
20  
21 state of Victoria, Australia, we investigated firstly, secular trends in prevalence of pre-  
22  
23 existing diabetes in pregnancy; secondly, trends in GDM burden; and finally, the effects of  
24  
25 including and excluding women with pre-existing diabetes on GDM prevalence estimates.  
26  
27

## 28 29 **Methods**

30  
31  
32 The Victorian Perinatal Data Collection (VPDC) is a population-based surveillance system,  
33  
34 maintained by the Consultative Council on Obstetric and Paediatric Mortality and Morbidity,  
35  
36 Victorian Department of Health. Information is routinely collected on all births of at least 20  
37  
38 weeks' gestation (or if gestation is not known, birthweight of at least 400g). Birth report  
39  
40 forms are completed at delivery by a clinician; notification of births to the VPDC by  
41  
42 hospitals, birthing centres and private midwife practitioners is mandatory. Therefore, the  
43  
44 database is considered to completely capture virtually all births in Victoria that fulfil  
45  
46 reporting requirements.  
47  
48

49  
50 De-identified data were extracted for all notified births that occurred in Victoria between 1  
51  
52 January 1999 and 31 December 2008. For pregnancies yielding more than one birth (i.e.  
53  
54 twins or more), only the birth record for the first-born infant was extracted. Each entry  
55  
56 therefore represents one pregnancy. As women may have had more than one pregnancy  
57  
58  
59  
60

1  
2  
3 during the study period, the same woman may be represented in the data set multiple times.  
4  
5 Variables used in this analysis were year of delivery, maternal age at delivery (categorised  
6  
7 into age groups of  $\leq 24$  years, 25-29, 30-34, 35-39,  $\geq 40$  years), parity, diabetes status (GDM,  
8  
9 pre-existing maternal diabetes not further specified, no diabetes), maternal Aboriginal and  
10  
11 Torres Strait Islander (i.e. Indigenous) status and maternal country of birth. Maternal country  
12  
13 of birth was reclassified into geographically-based regions using the Australian Bureau of  
14  
15 Statistics' *Standard Australian Classification of Countries*. This classification scheme  
16  
17 includes Australia in the group *Oceania and Antarctica*. However we categorised Australian-  
18  
19 born women separately into two additional groups: *Australian-born Indigenous* and  
20  
21 *Australian-born non-Indigenous*.  
22  
23

24  
25  
26 Maternal diabetes status was assigned based on whether the clinician completing the  
27  
28 notification form ticked the checkboxes for GDM or pre-existing maternal diabetes.  
29  
30 Recording of GDM and pre-existing diabetes in the VPDC are reported to be 99.4% and  
31  
32 99.8% accurate, respectively (35). Over the study period, Australian guidelines  
33  
34 recommended universal offer of GDM screening, with selective screening of high risk  
35  
36 women considered appropriate in resource limited or low prevalence settings. Screening is  
37  
38 performed at 26-28 weeks gestation and a positive result is a 1-hr venous plasma glucose  
39  
40 level of  $\geq 7.8$ mmol/L after a morning, non-fasting 50g glucose load or  $\geq 8$ mmol/L after a  
41  
42 morning, non-fasting 75g glucose load. Confirmation of GDM diagnosis after a positive  
43  
44 screening test requires an OGTT at 26-30 weeks gestation with venous plasma glucose levels  
45  
46 of  $\geq 5.5$ mmol/L at 0 hours and/or  $\geq 8$ mmol/L at 2 hours (5).  
47  
48  
49

### 50 51 ***Statistical analyses*** 52

53  
54 Maternal demographic characteristics over time were examined using descriptive statistics.  
55  
56 Crude and age-standardised annual prevalence rates of pre-existing diabetes, GDM and all  
57  
58  
59  
60

1  
2  
3 diabetes were calculated as a percentage of total annual pregnancies, using direct  
4  
5 standardisation to the maternal age structure of the entire study population. GDM prevalence  
6  
7 rates over time were further examined by maternal age group and region of birth. Small  
8  
9 numbers precluded similar analyses for pre-existing diabetes. To examine the effect of  
10  
11 denominator variation on overall GDM prevalence estimates, annual GDM prevalence rates  
12  
13 were also calculated after excluding from the denominator pregnancies in women with pre-  
14  
15 existing diabetes.  
16  
17

18  
19 Women who had more than one pregnancy during the study period were included in each  
20  
21 year that they delivered. This approach, coupled with the fact that having diabetes of any  
22  
23 form in pregnancy increases the likelihood of diabetes in subsequent pregnancies, meant that  
24  
25 observations were not necessarily independent. As the assumption of independence that  
26  
27 underlies tests for linear trend was not fulfilled, such analyses were not performed, and age-  
28  
29 standardised prevalence rates were considered significantly different if 95% confidence  
30  
31 intervals did not overlap. For sensitivity analysis, annual prevalence rates of pre-existing  
32  
33 diabetes, GDM and all diabetes were calculated after restricting to women giving birth for the  
34  
35 first time, and tests for linear trend were performed for this subgroup.  
36  
37  
38

39  
40 Data were analysed using Stata 11.0. Permission to access and analyse data was granted by  
41  
42 the Consultative Council on Obstetric and Paediatric Mortality and Morbidity, Victorian  
43  
44 Department of Health. The Flinders University Social and Behavioural Research ethics  
45  
46 committee exempted this study from requiring ethics approval, as it involved analysis of  
47  
48 existing de-identified data.  
49  
50

## 51 52 **Results**

53  
54  
55 During the ten-year study period, there were 634,932 pregnancies resulting in a birth  
56  
57 registration with the VPDC (Table 1). In 2008 there were 15.7% more pregnancies than in  
58  
59  
60

1  
2  
3 1999. Mean maternal age increased from 29.7 years in 1999 to 30.8 years in 2008. The  
4  
5 number of births to women aged 40 years and over was 91.3% higher in 2008 than in 1999.  
6  
7

8 Maternal region of birth was known for 99.7% ( $n=632,805$ ) of pregnancies, of which 74.6%  
9  
10 occurred in Australian-born women of non-Indigenous descent (Table 1). There was an  
11  
12 overall trend of an increasing number of pregnancies in women born in all regions, with the  
13  
14 exception of North-West Europe and Southern and Eastern Europe where there was a decline.  
15  
16 The trend of increasing pregnancies was particularly strong in women from Southern and  
17  
18 Central Asia (Table 1). The number of women becoming pregnant for the first time increased  
19  
20 during the study period with 5,486 (22.1%) more first pregnancies recorded in 2008  
21  
22 compared with 1999 (Table 1).  
23  
24

### 25 26 27 ***Diabetes in pregnancy***

28  
29  
30 In 2008, 6.1% of all pregnancies were complicated by some form of diabetes, compared with  
31  
32 4.3% in 1999 (Table 2). Each year, pregnancies occurring in older women (those aged 35-39  
33  
34 years and 40 years or older) had higher prevalence of any form of diabetes than pregnancies  
35  
36 in younger women (data not shown).  
37  
38

### 39 40 ***Prevalence of pre-existing maternal diabetes in pregnancy***

41  
42  
43 Between 1999 and 2008, 2,954 pregnancies (0.5%) occurred in women with known pre-  
44  
45 existing diabetes. The prevalence rate of pre-existing diabetes increased from 0.4% to 0.6%,  
46  
47 representing an increase of 50% over the study period and there was little difference between  
48  
49 the crude and age-standardised estimates (Figure 1a). The absolute annual number of  
50  
51 pregnancies in women with pre-existing diabetes almost doubled over this period.  
52  
53

54  
55 For the entire ten-year period, the greatest absolute number of pregnancies in women with  
56  
57 pre-existing diabetes occurred in Australian-born non-Indigenous women, and for the migrant  
58  
59  
60

1  
2  
3 groups, in those born in South-East Asia and Southern and Central Asia; pre-existing diabetes  
4 prevalence rates were however highest in pregnancies among women born in Southern and  
5 Central Asia and Sub-Saharan Africa (data not shown).  
6  
7  
8  
9

### 10 ***Prevalence of GDM***

11  
12 Of all pregnancies in Victoria from 1999 to 2008, 29,147 (4.6%) were complicated by GDM.  
13 Overall, the annual number of GDM pregnancies increased by 64% between 1999 and 2008.  
14 Increases in the absolute number of GDM pregnancies over time were apparent in all but the  
15 youngest group of women (Fig. 1b). GDM also increased as a proportion of total pregnancies,  
16 such that in 2008, the age-standardised GDM prevalence rate was 31% higher than in 1999  
17 (Table 2). Over the study period, crude GDM prevalence rates tended to increase in  
18 pregnancies among women in most age groups (Figure 1c). Analysis of data from women in  
19 their first pregnancy who did not have pre-existing diabetes revealed a significant positive  
20 linear trend in the prevalence of the crude ( $p<0.001$ ) and age-standardised ( $p<0.001$ ) rates of  
21 GDM over the study period.  
22  
23  
24  
25  
26  
27  
28  
29  
30  
31  
32  
33  
34  
35

36 Considerable differences in GDM prevalence rates existed by maternal region of birth (Figure  
37 2). Prevalence increased over time, both amongst Australian-born non-Indigenous women  
38 and overseas-born women considered collectively. However, the same pattern was not  
39 evident when considering Indigenous Australians and each migrant group individually. The  
40 extent of the changes in GDM prevalence rates over time varied by migrant origin status. In  
41 Australian-born non-Indigenous women, age-standardised GDM prevalence in 2007 and  
42 2008 was 29% higher than in 1999 and 2000 (4.0% vs. 3.1%), whereas amongst all overseas-  
43 born women collectively, prevalence increased by 12.3% between these two time periods  
44 (8.2% vs. 7.3%; Figure 2) with differences between the various groups.  
45  
46  
47  
48  
49  
50  
51  
52  
53  
54  
55

### 56 ***Effect of denominator variation***

1  
2  
3 Including or excluding women with pre-existing diabetes had little effect on GDM prevalence  
4 rates overall (Table 2). Estimates were generally similar, albeit lower, when considering only  
5 women in their first pregnancy (Supplementary Table 1). Including or excluding women with  
6 pre-existing diabetes also had very little effect on GDM prevalence rates by maternal region  
7 of birth (data not shown).  
8  
9

## 10 11 12 13 14 15 **Discussion**

16  
17  
18 Prevalence of both pre-existing diabetes in pregnancy and GDM increased in Victoria,  
19 Australia over the period 1999 to 2008. The number of births to older mothers increased over  
20 the study period, almost doubling for those aged 40 years and over. However, age-  
21 standardising had little effect on prevalence rates, and GDM prevalence increased within  
22 most maternal age groups, indicating that rising maternal age does not fully explain the  
23 upward trends. GDM prevalence increased to a greater extent in pregnancies amongst  
24 Australian-born non-Indigenous women compared with rates in all overseas-born women.  
25 Consistent with existing knowledge (20, 22, 23, 28-31), pregnancies occurring in women  
26 born throughout Asia and in North Africa and the Middle East had the highest GDM rates.  
27  
28

29  
30  
31 Similar to recent reports of rising trends in GDM burden nationally (20) and in the  
32 multiethnic state of New South Wales (3, 23), we noted a pronounced increase in overall  
33 GDM prevalence in Victoria from 1999 to 2008. This may reflect secular increases in  
34 obesity prevalence in the general population (36); effects of obesity could not be examined as  
35 maternal pre-pregnancy body mass index (BMI) was not recorded in the VPDC during the  
36 study period. BMI trend data in Australian obstetric patients are sparse and generally from  
37 single centers (for example, 37). Maternal BMI has been recorded in the VPDC since 2009;  
38 further research is required in the Australian context when population-level obstetric BMI  
39 trend data become available.  
40  
41  
42  
43  
44  
45  
46  
47  
48  
49  
50  
51  
52  
53  
54  
55  
56  
57  
58  
59  
60



1  
2  
3 In our study GDM prevalence increased across most maternal age groups. This and the fact  
4 that results were generally similar when restricting to primiparous women indicates that  
5 factors other than those examined in this study likely largely account for the observed trends.  
6  
7 In the general Australian population, prevalence of overweight/obesity has increased across  
8 most age groups over time (38) and this may be contributing to the rising GDM prevalence  
9 observed in our study among most groups including the younger mothers. Rising GDM  
10 prevalence may also reflect increases in pre-existing but previously undiagnosed diabetes; as  
11 postnatal OGTT results were not available, the extent to which this is the case cannot be  
12 established. Additionally, GDM ascertainment may be influenced by systemic factors, which  
13 themselves may change over time. In particular, screening and diagnostic practices and  
14 uptake rates will influence case detection. For example, after introduction of universal OGTT  
15 testing in a regional hospital in northern Australia, testing rates in Indigenous Australian  
16 women increased from 31.4% in 2006 to 65.6% in 2008 and GDM rates tripled (26).  
17  
18  
19  
20  
21  
22  
23  
24  
25  
26  
27  
28  
29  
30  
31

32 This study has demonstrated that migrant disparities in GDM prevalence appear to be  
33 diminishing, but in a concerning rather than desirable manner: increases in GDM prevalence  
34 rates over time were most pronounced in Australian-born non-Indigenous women, among  
35 whom GDM prevalence was converging with the higher rates in overseas-born mothers. A  
36 similar phenomenon closing the gap in burden of diabetes in pregnancy between high rate  
37 Indigenous and increasingly higher rate non-Indigenous Australian women has also been  
38 previously described (20, 24). The desired key to reducing overall disease burden and socio-  
39 cultural inequities is to close the gap by reducing prevalence among high risk groups and to  
40 contain and ideally reduce the prevalence among lower risk groups. Our findings differ from  
41 recent national reports that GDM increased to a similar extent amongst Australian-born (23%  
42 increase) and all overseas-born mothers collectively (24% increase), with differential  
43 increases between individual migrant groups, for the period 2000-01 and 2005-06 (20). That  
44  
45  
46  
47  
48  
49  
50  
51  
52  
53  
54  
55  
56  
57  
58  
59  
60

1  
2  
3 GDM burden in Victoria increased over time amongst all migrant groups collectively but not  
4  
5 individually may be due to the fact that the proportion of mothers born in high prevalence  
6  
7 regions and giving birth in Victoria has increased over time (39), but our study may have  
8  
9 been underpowered to detect differences within individual migrant groups. Alternatively, it is  
10  
11 possible that risk factor distribution or screening uptake may have changed more over time  
12  
13 for some groups than others, or that there is a difference in the proportion of diagnosed to  
14  
15 undiagnosed diabetes between migrants and local-born women. Future research should seek  
16  
17 to confirm our results and investigate underlying causes.  
18  
19

20  
21 In contrast to earlier findings (3), recent work suggests that in the Australian obstetric  
22  
23 population, pre-existing type 2 diabetes is now as common as type 1 diabetes (2), and even  
24  
25 the predominant form of pre-existing diabetes in pregnancy (40). The increasing number of  
26  
27 pregnancies in women with pre-existing diabetes observed in our study is consistent with  
28  
29 international findings (7-9, 11, 12) and reinforces the urgent need for population-level  
30  
31 preventive initiatives to address the growing public health problem of diabetes in the young.  
32  
33 These upward trends are likely to continue, particularly in the setting of the obesity and type  
34  
35 2 diabetes epidemics in the general population (36), evidence of earlier onset of type 2  
36  
37 diabetes, trends toward delayed childbearing (39) and introduction of new antenatal screening  
38  
39 guidelines (6, 32) that will increase case detection.  
40  
41  
42  
43

44  
45 There are a number of strengths to this study. This is one of few papers to report secular  
46  
47 trends in Australian population-level prevalence of pre-existing diabetes in pregnancy (3) and  
48  
49 to our knowledge, the only one to present data spanning a decade. It is also one of few  
50  
51 Australian studies, and the first from Victoria since the early 1990s, to report ethno-specific  
52  
53 secular trends in GDM prevalence. This is important because of Australia's diverse and  
54  
55 evolving multi-ethnic demography. Others have reported their GDM prevalences after  
56  
57 excluding pre-existing diabetes as sensitivity analysis (19) but as far as we are aware, our  
58  
59  
60

1  
2  
3 paper is the first to specifically examine using a single database the effect of including or  
4  
5 excluding the growing group of women with pre-existing diabetes on GDM prevalence  
6  
7 estimates, in important subgroups such as region of birth where denominator variation  
8  
9 plausibly might have an effect. This methodological issue is likely to become increasingly  
10  
11 relevant, with implications for service planning and delivery and preventive efforts  
12  
13 worldwide.  
14

15  
16  
17 The data source was a comprehensive population-level perinatal data collection. Case  
18  
19 ascertainment depends on accurate completion of birth report forms - training manuals exist  
20  
21 to facilitate this. Data collection forms did not change over the study period, with GDM and  
22  
23 pre-existing diabetes status recorded consistently using checkboxes; this reduces the  
24  
25 likelihood of ascertainment bias over time.  
26

27  
28  
29 Study limitations should be noted. Australian guidelines over the study period recommended  
30  
31 universal screening for GDM, with selective screening to be considered in settings with  
32  
33 limited resources or low GDM burden (5). As it is not possible to identify unscreened  
34  
35 pregnancies in our data, all pregnancies yielding births that were reported to the VPDC  
36  
37 during the study period were included in this analysis. Some women may not have been  
38  
39 tested for GDM, so our rates are minimum estimates. Screening practice may have varied  
40  
41 between clinicians and centers. For example, in 1999 there was considerable variation in  
42  
43 GDM testing in Australian hospitals, including differences in the universal versus selective  
44  
45 offer of screening and the testing protocols used (41). Testing practices within centers may  
46  
47 also have changed over time (26). To enable identification of screened pregnancies, we  
48  
49 suggest that information on diabetes testing status should be collected in perinatal data sets.  
50  
51 Finally, the region of birth classifications used in this study were necessarily broad and may  
52  
53 mask heterogeneity within and between groups. Women may have been born in Australia but  
54  
55 have the behavioural and biological risk factor profiles of their ethnic group of origin;  
56  
57  
58  
59  
60

1  
2  
3 ethnicity data are not captured in the VPDC so it is not possible to ascertain the extent to  
4  
5 which this is the case.  
6  
7

8 In summary, prevalence of both pre-existing diabetes and GDM increased among the  
9  
10 Victorian obstetric population between 1999 and 2008 and these increases are not fully  
11  
12 explained by rising maternal age. GDM prevalence increased at a greater rate amongst  
13  
14 Australian-born non-Indigenous women than among migrant women. These findings have  
15  
16 important implications across all levels of the healthcare system, from the primary prevention  
17  
18 sphere to pre-pregnancy counselling and antenatal clinical service provision, through to  
19  
20 postnatal management of both mother and infant and tertiary prevention and monitoring. As  
21  
22 such, these results have clear implications for clinicians, who need to be aware of the socio-  
23  
24 cultural distribution of GDM and actively managing women at risk. This information is also  
25  
26 important for policymakers and the public health profession, both to guide preventive  
27  
28 initiatives and to facilitate health service planning in the face of an increasing morbidity  
29  
30 burden for mothers and offspring as prevalence of GDM and pre-existing diabetes increase.  
31  
32 Given the health risks conferred on infants of pregnancies complicated by diabetes,  
33  
34 addressing the rising burden of diabetes of any form in pregnancy is essential if we are to  
35  
36 break the cycle of intergenerational diabetes transmission and reverse the direction and slope  
37  
38 of trend graphs in future.  
39  
40  
41  
42  
43

44 Finally, there has been debate surrounding many aspects of GDM epidemiology, but the issue  
45  
46 of denominator variation is one that appears to have been overlooked, yet warrants  
47  
48 consideration. Although having negligible effect in our data set given low rates of pre-  
49  
50 existing diabetes, to include pre-existing diabetes in the denominator could potentially  
51  
52 underestimate GDM prevalence; to exclude pre-existing cases could underestimate the total  
53  
54 burden of diabetes in pregnancy. These issues should come to the attention of expert groups:  
55  
56 a consistent approach is required, in order to accurately gauge disease burden, compare  
57  
58  
59  
60

1  
2  
3 prevalence within and between populations, and monitor trends. Perhaps the best approach is  
4  
5 to report prevalence of both GDM and pre-existing diabetes separately. Particularly given the  
6  
7 looming rise in diagnosed cases of pre-existing disease, measurement methodology will  
8  
9 increasingly matter.  
10

### 11 12 13 14 15 16 **Contributors**

17  
18 MA conceived and designed the study, assisted with data analysis and interpretation, wrote  
19  
20 and edited manuscript; VV analysed and interpreted data, edited manuscript; EDJ designed  
21  
22 the study, edited manuscript; M.-A.D designed the study, analysed and interpreted data,  
23  
24 edited manuscript; BP conceived and designed the study, analysed and interpreted data; JO  
25  
26 edited manuscript; JD conceived and designed the study, edited manuscript, supervised the  
27  
28 study and is the guarantor.  
29  
30

31  
32  
33 Some findings from these data were presented as a poster at the 6th International Symposium  
34  
35 on Diabetes and Pregnancy conference in Salzburg, Austria in March 2011.  
36  
37

38  
39  
40 **Funding:** This research received no specific grant from any funding agency in the public,  
41  
42 commercial or not-for-profit sectors.  
43

44  
45 **Competing interests:** none  
46

47  
48 **Data sharing statement:** The statistical code used to generate the results in this article is  
49  
50 available from the corresponding author upon request. The custodian of the dataset used in  
51  
52 this article is the Consultative Council on Obstetric and Paediatric Mortality and Morbidity  
53  
54 (CCOPMM). All enquiries to access this dataset should be directed to CCOPMM.  
55  
56  
57  
58  
59  
60

## Figure legends and captions

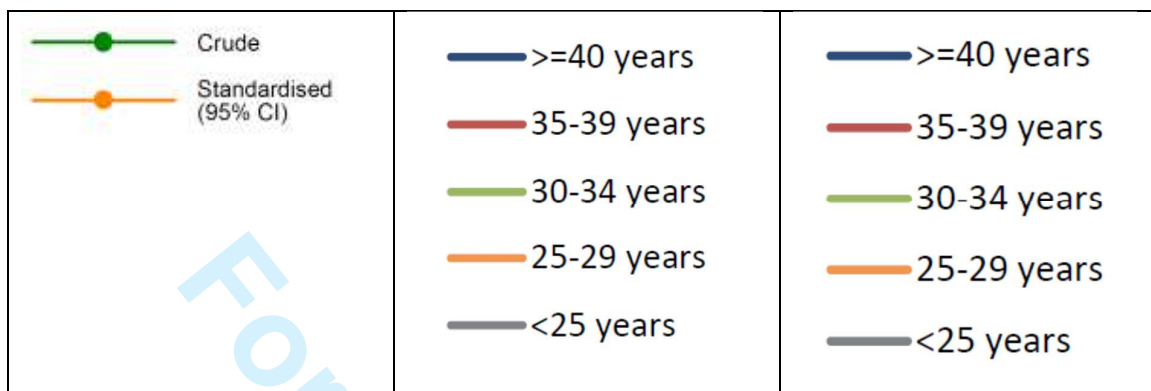

**Figure 1: (a) Crude and age-standardised prevalence of pre-existing maternal diabetes in pregnancy by year of delivery, Victoria 1999-2008; (b) Crude number of GDM cases by year of delivery and maternal age group, Victoria 1999-2008; (c) Crude GDM prevalence rates\* by year of delivery and maternal age group, Victoria 1999-2008.**

\* the denominator used to calculate prevalence of GDM is all pregnancies

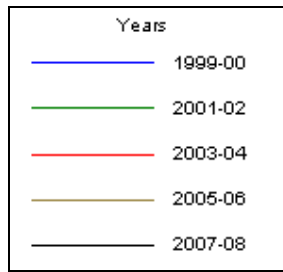

**Fig. 2: Age-standardised GDM prevalence rates\* by maternal region of birth and year of delivery, Victoria 1999-2008**

\* the denominator used to calculate prevalence of GDM is all pregnancies

## REFERENCES

1. Hodson K, Robson S, Taylor R. Gestational diabetes: emerging concepts in pathophysiology. *Obstetric Medicine*. 2010;3(4):128-32.
2. Australian Institute of Health and Welfare. Diabetes in pregnancy: its impact on Australian women and their babies. Diabetes series no. 14. Cat. no. CVD 52. Canberra: AIHW; 2010.
3. Shand AW, Bell JC, McElduff A, et al. Outcomes of pregnancies in women with pre-gestational diabetes mellitus and gestational diabetes mellitus; a population-based study in New South Wales, Australia, 1998-2002. *Diabetic Medicine*. 2008;25:708-15.
4. McElduff A, Cheung NW, McIntyre HD, et al. The Australasian Diabetes in Pregnancy Society consensus guidelines for the management of type 1 and type 2 diabetes in relation to pregnancy. *Medical Journal of Australia*. 2005;183(7):373-7.
5. Hoffman L, Nolan C, Wilson JD, et al. Gestational diabetes mellitus - management guidelines. The Australasian Diabetes in Pregnancy Society. *Medical Journal of Australia*. 1998;169(2):93-7.
6. Nankervis A, McIntyre HD, Moses R, et al. Australasian Diabetes in Pregnancy Society (ADIPS) consensus guidelines for the testing and diagnosis of gestational diabetes mellitus in Australia. 2013; Version 2:3/5/13.
7. Lawrence JM, Contreras R, Chen W, et al. Trends in the prevalence of preexisting diabetes and gestational diabetes mellitus among a racially/ethnically diverse population of pregnant women, 1999-2005. *Diabetes Care*. 2008;31(5):899-904.
8. Bell R, Bailey K, Cresswell T, et al. Trends in prevalence and outcomes of pregnancy in women with pre-existing type I and type II diabetes. *BJOG: An International Journal of Obstetrics & Gynaecology*. 2008;115(4):445-52.
9. Thorpe LE, Berger D, Ellis JA, et al. Trends and racial/ethnic disparities in gestational diabetes among pregnant women in New York City, 1990-2001. *Am J Public Health*. 2005;95(9):1536-9.
10. Falhammar H, Davis B, Bond D, et al. Maternal and neonatal outcomes in the Torres Strait Islands with a sixfold increase in type 2 diabetes in pregnancy over six years. *Aust N Z J Obstet Gynaecol*. 2010;50:120-6.
11. Feig, DS, Hwee J, Shah BR, et al. Trends in incidence of diabetes in pregnancy and serious perinatal outcomes: a large, population-based study in Ontario, Canada, 1996-2010. *Diabetes Care*. 2014;37(6):1590-6
12. Albrecht SS, Kuklina EV, Bansil P, et al. Diabetes trends among delivery hospitalisations in the U.S., 1994-2004. *Diabetes Care*. 2010;33(4):768-73.
13. Aljohani N, Rempel BM, Ludwig S, et al. Gestational diabetes in Manitoba during a twenty-year period. *Clin Invest Med*. 2008;31(3):E131-E7.
14. Zhang F, Dong L, Zhang CP, et al. Increasing prevalence of gestational diabetes mellitus in Chinese women from 1999 to 2008. *Diabetic Medicine*. 2011;28(6):652-7.
15. Rajab KE, Issa AA, Hasan ZA, et al. Incidence of gestational diabetes mellitus in Bahrain from 2002 to 2010. *International Journal of Gynecology & Obstetrics*. 2012;117(1):74-7.
16. Getahun D, Nath C, Ananth CV, et al. Gestational diabetes in the United States: temporal trends 1989 through 2004. *American Journal of Obstetrics & Gynecology*. 2008;198(5).
17. Lu GC, Rouse DJ, DuBard M, et al. The effect of the increasing prevalence of maternal obesity on perinatal morbidity. *American Journal of Obstetrics & Gynecology*. 2001;185(4):845-9.
18. Ferrara A, Kahn HS, Quesenberry CP, et al. An increase in the incidence of gestational diabetes mellitus: Northern California, 1991-2000. *Obstet Gynecol*. 2004;103(3):526-33.



19. Wang Y, Chen L, Xiao K, et al. Increasing incidence of gestational diabetes mellitus in Louisiana, 1997-2009. *Journal of Women's Health*. 2012;21(3):319-25.
20. Templeton M, Pieris-Caldwell I. Gestational diabetes mellitus in Australia, 2005-06. Diabetes series no. 10. Cat. no. CVD 44. Canberra: AIHW; 2008.
21. Henry OA, Beischer NA, Sheedy MT, et al. Gestational diabetes and follow-up among immigrant Vietnam-born women. *The Australian and New Zealand Journal of Obstetrics and Gynaecology*. 1993;33(2):109-14.
22. Beischer NA, Oats JN, Henry OA, et al. Incidence and severity of gestational diabetes mellitus according to country of birth in women living in Australia. *Diabetes*. 1991;2:35-8.
23. Anna V, van der Ploeg HP, Wah Cheung N, et al. Sociodemographic correlates of the increasing trend in prevalence of gestational diabetes mellitus in a large population of women between 1995 and 2005. *Diabetes Care*. 2008;31(12):2288-93.
24. Ishak M, Petocz P. Gestational diabetes among Aboriginal Australians: prevalence, time trend and comparisons with non-Aboriginal Australians. *Ethnicity and Disease*. 2003;13(Winter 2003):55-60.
25. Kim SY, Humphrey MD. Decrease in incidence of gestational diabetes mellitus in Far North Queensland between 1992 and 1996. *Aust NZ J Obstet Gynaecol*. 1999;39(1):40-3.
26. Davis B, McLean A, Sinha AK, et al. A threefold increase in gestational diabetes over two years: Review of screening practices and pregnancy outcomes in Indigenous women of Cape York, Australia. *Australian and New Zealand Journal of Obstetrics and Gynaecology*. 2013;53:363-8.
27. Ferrara A. Increasing prevalence of gestational diabetes mellitus. A public health perspective. *Diabetes Care*. 2007;30(S2):S141-S6.
28. Carolan M, Davey M-A, Biro MA, et al. Maternal age, ethnicity and gestational diabetes mellitus. *Midwifery*. 2012; 28(6):778-83.
29. Stone CA, McLachlan KA, Halliday JL, et al. Gestational diabetes in Victoria in 1996: incidence, risk factors and outcomes. *Medical Journal of Australia*. 2002;177:486-91.
30. Teh WT, Teede HJ, Paul E, et al. Risk factors for gestational diabetes mellitus: Implications for the application of screening guidelines. *Australian and New Zealand Journal of Obstetrics and Gynaecology*. 2011;51:26-30.
31. Moses RG, Griffiths RD, McPherson S. The incidence of gestational diabetes mellitus in the Illawarra area of New South Wales. *Australian & New Zealand Journal of Obstetrics & Gynaecology*. 1994;34(4):425-7.
32. International Association of Diabetes in Pregnancy Study Groups Consensus Panel. International Association of Diabetes and Pregnancy Study Groups Recommendations on the Diagnosis and Classification of Hyperglycemia in Pregnancy. *Diabetes Care*. 2010 March 1, 2010;33(3):676-82.
33. Moses RG, Morris GJ, Petocz P, et al. The impact of potential new diagnostic criteria on the prevalence of gestational diabetes mellitus in Australia. *Medical Journal of Australia*. 2011;194(7):338-40.
34. McIntyre HD. Diagnosing gestational diabetes mellitus: rationed or rationally related to risk? *Diabetes Care*. 2013;36(10):2879-80.
35. Davey M-A, Sloan M-L, Palma S, et al. Methodological processes in validating and analysing the quality of population-based data: a case study using the Victorian Perinatal Data Collection. *Health Information Management Journal*. 2013;42(3):12-9.
36. Department of Health 2011. Victorian population health survey 2009. State Government of Victoria: Melbourne. Available from: <http://www.health.vic.gov.au/healthstatus/survey/vphs2009.htm>.
37. McIntyre HD, Gibbons KS, Flenady VJ, et al. Overweight and obesity in Australian mothers: epidemic or endemic? *Medical Journal of Australia*. 2012;196(3):184-8.

- 1
- 2
- 3 38. Australian Institute of Health and Welfare. Risk factor trends: age patterns in key
- 4 health risks over time. Cat. no. PHE 166. Canberra: AIHW 2012.
- 5 39. Consultative Council on Obstetric and Paediatric Mortality and Morbidity. Births in
- 6 Victoria 2007 and 2008. Melbourne: Department of Health 2010.
- 7 40. McElduff A, Ross GP, Lagstrom JA, et al. Pregestational diabetes and pregnancy. An
- 8 Australian experience. Diabetes Care. 2005;28(5):1260.
- 9 41. Rumbold AR, Crowther CA. Guideline use for gestational diabetes mellitus and
- 10 current screening, diagnostic and management practices in Australian hospitals. Australian
- 11 and New Zealand Journal of Obstetrics and Gynaecology. 2001;41(1):86-90.
- 12
- 13
- 14
- 15
- 16
- 17
- 18
- 19
- 20
- 21
- 22
- 23
- 24
- 25
- 26
- 27
- 28
- 29
- 30
- 31
- 32
- 33
- 34
- 35
- 36
- 37
- 38
- 39
- 40
- 41
- 42
- 43
- 44
- 45
- 46
- 47
- 48
- 49
- 50
- 51
- 52
- 53
- 54
- 55
- 56
- 57
- 58
- 59
- 60

For peer review only

**Table 1: Maternal demographic characteristics for pregnancies yielding births notified to the Victorian Perinatal Data Collection by year of delivery, Victoria 1999-2008.\***

|                                    | Year of delivery |        |        |        |        |        |        |        |        |        | Total<br>1999-2008 |
|------------------------------------|------------------|--------|--------|--------|--------|--------|--------|--------|--------|--------|--------------------|
|                                    | 1999             | 2000   | 2001   | 2002   | 2003   | 2004   | 2005   | 2006   | 2007   | 2008   |                    |
| <b>Maternal age group (N)</b>      |                  |        |        |        |        |        |        |        |        |        |                    |
| <=24 years                         | 9768             | 9363   | 9270   | 9152   | 8903   | 8644   | 8895   | 9445   | 9619   | 9762   | 92821              |
| 25-29 years                        | 19074            | 18537  | 17283  | 16535  | 16241  | 15740  | 16213  | 16739  | 17652  | 17583  | 171597             |
| 30-34 years                        | 20485            | 20957  | 21667  | 22615  | 23050  | 23119  | 23748  | 24447  | 24475  | 24021  | 228584             |
| 35-39 years                        | 9456             | 9839   | 9895   | 10563  | 10796  | 11534  | 12765  | 13859  | 15137  | 15420  | 119264             |
| >=40 years                         | 1641             | 1731   | 1879   | 1981   | 2117   | 2241   | 2393   | 2658   | 2854   | 3139   | 22634              |
| <b>Total</b>                       | 60424            | 60427  | 59994  | 60846  | 61107  | 61278  | 64014  | 67148  | 69737  | 69925  | 634900             |
| <b>% aged &gt;30</b>               | 52.27            | 53.83  | 55.74  | 57.78  | 58.85  | 60.21  | 60.78  | 61.01  | 60.89  | 60.89  | 58.33              |
| <b>Parity</b>                      |                  |        |        |        |        |        |        |        |        |        |                    |
| 1                                  | 24,879           | 25,242 | 24,662 | 25,511 | 26,015 | 26,328 | 27,568 | 29,024 | 30,066 | 30,362 | 269,657            |
| 2 or higher                        | 35,545           | 35,185 | 35,332 | 35,335 | 35,091 | 34,950 | 36,446 | 38,124 | 39,671 | 39,563 | 365,242            |
| <b>Region of birth<sup>†</sup></b> |                  |        |        |        |        |        |        |        |        |        |                    |
| Australia (non-Indigenous)         | 45,573           | 45,258 | 45,236 | 46,076 | 46,014 | 45,985 | 47,715 | 49,764 | 50,342 | 50,042 | 472,005            |
| Oceania                            | 1,496            | 1,488  | 1,626  | 1,566  | 1,663  | 1,636  | 1,685  | 1,838  | 1,846  | 1,974  | 16,818             |
| North-West Europe                  | 2,565            | 2,438  | 2,353  | 2,275  | 2,134  | 2,127  | 2,156  | 2,250  | 2,400  | 2,213  | 22,911             |
| Southern & Eastern Europe          | 1,821            | 1,700  | 1,595  | 1,527  | 1,611  | 1,440  | 1,468  | 1,477  | 1,562  | 1,451  | 15,652             |
| North Africa & Middle East         | 1,630            | 1,573  | 1,537  | 1,581  | 1,669  | 1,684  | 1,889  | 1,979  | 1,997  | 2,146  | 17,685             |
| South-East Asia                    | 3,234            | 3,667  | 3,304  | 3,364  | 3,506  | 3,419  | 3,427  | 3,598  | 4,053  | 4,113  | 35,685             |
| North-East Asia                    | 1,158            | 1,256  | 1,080  | 1,125  | 1,061  | 1,122  | 1,148  | 1,305  | 1,691  | 1,704  | 12,650             |
| Southern & Central Asia            | 1,125            | 1,184  | 1,194  | 1,228  | 1,346  | 1,512  | 1,793  | 2,195  | 2,675  | 3,251  | 17,503             |
| Americas                           | 651              | 693    | 721    | 734    | 691    | 744    | 806    | 840    | 864    | 846    | 7,590              |
| Sub-Saharan Africa                 | 708              | 765    | 863    | 854    | 905    | 990    | 1,152  | 1,145  | 1,260  | 1,248  | 9,890              |
| Australia (Indigenous)             | 397              | 325    | 358    | 366    | 326    | 394    | 463    | 501    | 628    | 658    | 4,416              |

\* Includes women who had more than one pregnancy during the study period; 32 births had no information on age of mother and one birth had no information on parity

† Of the 634,932 registered births 2127 recorded the maternal region of birth as unknown.

Table 2: Crude and age-standardised prevalence of GDM by year of delivery and denominator, Victoria 1999-2008

| Year | n<br>(all births) | n<br>(GDM) | GDM /all pregnancies (%) |                  | GDM/all pregnancies less<br>pre-existing (%) |                       | All forms of diabetes in<br>pregnancy (%) |                  |
|------|-------------------|------------|--------------------------|------------------|----------------------------------------------|-----------------------|-------------------------------------------|------------------|
|      |                   |            | Crude                    | Age-standardised | Crude                                        | Age-<br>standardised* | Crude                                     | Age-standardised |
| 1999 | 60424             | 2356       | 3.90                     | 4.10 (3.94-4.26) | 3.91                                         | 4.11 (3.95-4.28)      | 4.27                                      | 4.48 (4.31-4.65) |
| 2000 | 60431             | 2548       | 4.22                     | 4.38 (4.21-4.55) | 4.23                                         | 4.39 (4.23-4.56)      | 4.56                                      | 4.73 (4.56-4.90) |
| 2001 | 59997             | 2593       | 4.32                     | 4.43 (4.26-4.60) | 4.34                                         | 4.45 (4.28-4.61)      | 4.71                                      | 4.82 (4.65-5.00) |
| 2002 | 60847             | 2752       | 4.52                     | 4.58 (4.41-4.74) | 4.54                                         | 4.59 (4.43-4.76)      | 4.95                                      | 5.00 (4.83-5.18) |
| 2003 | 61111             | 2611       | 4.27                     | 4.29 (4.13-4.46) | 4.29                                         | 4.31 (4.15-4.47)      | 4.71                                      | 4.73 (4.56-4.90) |
| 2004 | 61283             | 2547       | 4.16                     | 4.13 (3.97-4.29) | 4.17                                         | 4.15 (3.99-4.31)      | 4.61                                      | 4.58 (4.42-4.75) |
| 2005 | 64022             | 3027       | 4.73                     | 4.66 (4.50-4.83) | 4.75                                         | 4.69 (4.52-4.85)      | 5.24                                      | 5.17 (5.00-5.34) |
| 2006 | 67150             | 3295       | 4.91                     | 4.82 (4.66-4.98) | 4.93                                         | 4.85 (4.69-5.01)      | 5.43                                      | 5.34 (5.17-5.51) |
| 2007 | 69738             | 3559       | 5.10                     | 4.98 (4.82-5.14) | 5.13                                         | 5.01 (4.85-5.17)      | 5.67                                      | 5.53 (5.37-5.70) |
| 2008 | 69929             | 3859       | 5.52                     | 5.37 (5.21-5.54) | 5.55                                         | 5.40 (5.24-5.57)      | 6.12                                      | 5.96 (5.78-6.13) |

\* Age-standardised to the age structure of the entire study population for the ten year period, excluding those with pre-existing diabetes

1  
2  
3  
4  
5  
6  
7  
8  
9  
10  
11  
12  
13  
14  
15  
16  
17  
18  
19  
20  
21  
22  
23  
24  
25  
26  
27  
28  
29  
30  
31  
32  
33  
34  
35  
36  
37  
38  
39  
40  
41  
42  
43  
44  
45  
46  
47  
48  
49

For peer review only

1  
2  
3  
4  
5  
6  
7  
8  
9  
10  
11  
12  
13  
14  
15  
16  
17  
18  
19  
20  
21  
22  
23  
24  
25  
26  
27  
28  
29  
30  
31  
32  
33  
34  
35  
36  
37  
38  
39  
40  
41  
42  
43  
44  
45  
46  
47  
48  
49  
50  
51  
52  
53  
54  
55  
56  
57  
58  
59  
60

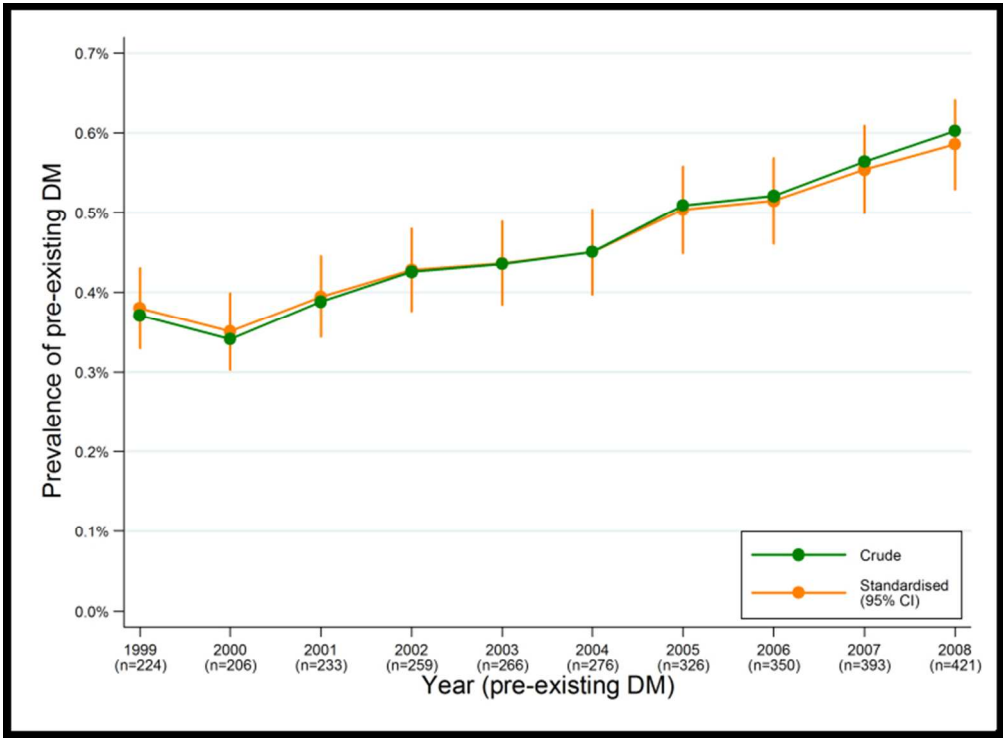

review only

1  
2  
3  
4  
5  
6  
7  
8  
9  
10  
11  
12  
13  
14  
15  
16  
17  
18  
19  
20  
21  
22  
23  
24  
25  
26  
27  
28  
29  
30  
31  
32  
33  
34  
35  
36  
37  
38  
39  
40  
41  
42  
43  
44  
45  
46  
47  
48  
49  
50  
51  
52  
53  
54  
55  
56  
57  
58  
59  
60

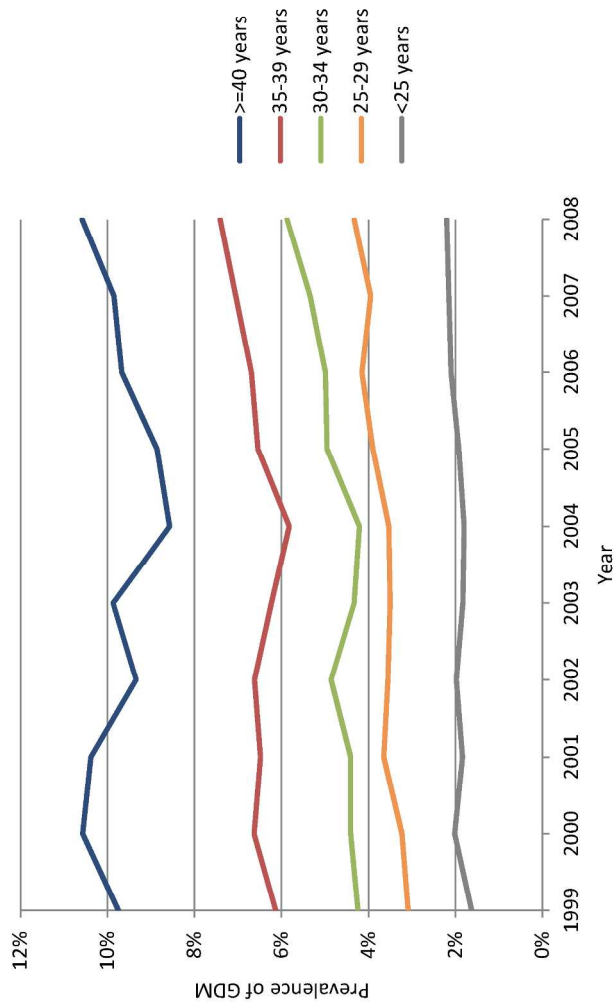

215x279mm (300 x 300 DPI)

1  
2  
3  
4  
5  
6  
7  
8  
9  
10  
11  
12  
13  
14  
15  
16  
17  
18  
19  
20  
21  
22  
23  
24  
25  
26  
27  
28  
29  
30  
31  
32  
33  
34  
35  
36  
37  
38  
39  
40  
41  
42  
43  
44  
45  
46  
47  
48  
49  
50  
51  
52  
53  
54  
55  
56  
57  
58  
59  
60

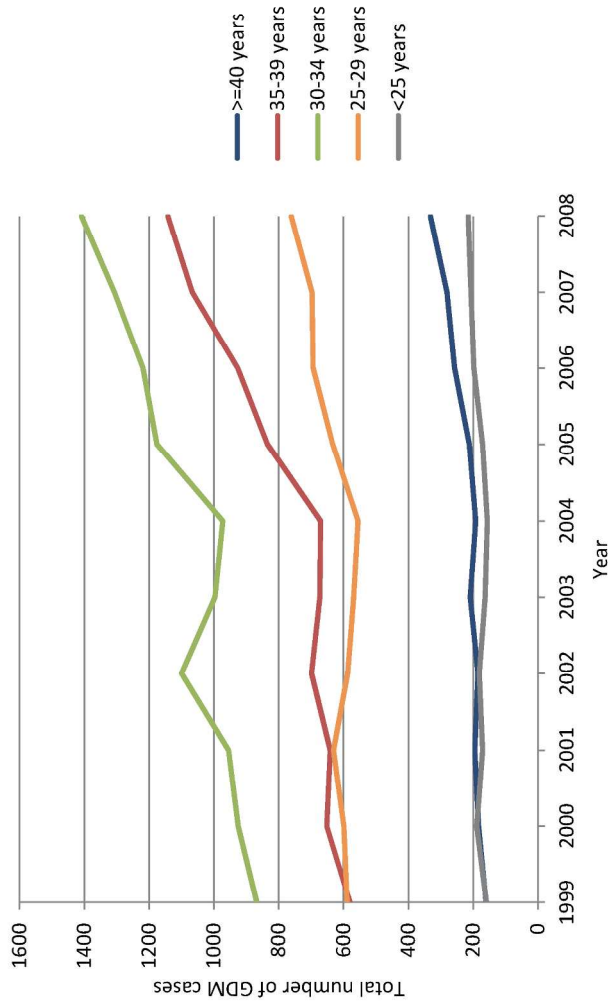

215x279mm (300 x 300 DPI)



1  
2  
3  
4  
5  
6  
7  
8  
9  
10  
11  
12  
13  
14  
15  
16  
17  
18  
19  
20  
21  
22  
23  
24  
25  
26  
27  
28  
29  
30  
31  
32  
33  
34  
35  
36  
37  
38  
39  
40  
41  
42  
43  
44  
45  
46  
47  
48  
49  
50  
51  
52  
53  
54  
55  
56  
57  
58  
59  
60

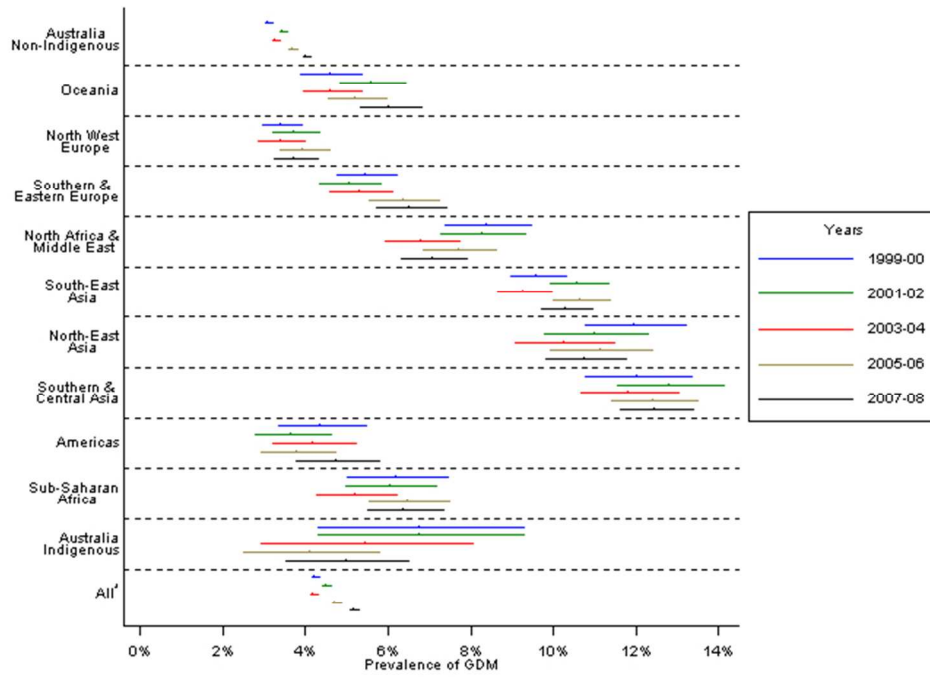

242x175mm (72 x 72 DPI)

View only

**SUPPLEMENTARY TABLE 1: Crude and age-standardised prevalence of GDM by year of delivery and denominator among women in their first pregnancy, Victoria 1999-2008**

| Year | GDM /all first pregnancies (%) |                | GDM/all first pregnancies less those in women with pre-existing diabetes (%) |                  | All forms of diabetes in pregnancy (%) |                   |      |                  |
|------|--------------------------------|----------------|------------------------------------------------------------------------------|------------------|----------------------------------------|-------------------|------|------------------|
|      | <i>n</i> (all births)          | <i>n</i> (GDM) | Crude                                                                        | Age-standardised | Crude                                  | Age-standardised* |      |                  |
| 1999 | 24879                          | 908            | 3.65                                                                         | 4.24 (3.95-4.53) | 3.66                                   | 4.26 (3.96-4.55)  | 4.00 | 4.62 (4.31-4.92) |
| 2000 | 25243                          | 988            | 3.91                                                                         | 4.57 (4.27-4.87) | 3.93                                   | 4.58 (4.28-4.88)  | 4.22 | 4.90 (4.60-5.21) |
| 2001 | 24664                          | 965            | 3.91                                                                         | 4.42 (4.13-4.71) | 3.93                                   | 4.44 (4.14-4.73)  | 4.27 | 4.81 (4.51-5.11) |
| 2002 | 25512                          | 1105           | 4.33                                                                         | 4.78 (4.49-5.07) | 4.35                                   | 4.80 (4.51-5.09)  | 4.75 | 5.24 (4.94-5.54) |
| 2003 | 26019                          | 1057           | 4.06                                                                         | 4.44 (4.17-4.71) | 4.08                                   | 4.47 (4.19-4.74)  | 4.53 | 4.95 (4.66-5.23) |
| 2004 | 26332                          | 1027           | 3.90                                                                         | 4.28 (3.96-4.60) | 3.91                                   | 4.24 (3.98-4.50)  | 4.30 | 4.62 (4.35-4.89) |
| 2005 | 27575                          | 1191           | 4.32                                                                         | 4.66 (4.37-4.95) | 4.34                                   | 4.68 (4.42-4.95)  | 4.85 | 5.22 (4.94-5.50) |
| 2006 | 29026                          | 1364           | 4.70                                                                         | 5.02 (4.75-5.28) | 4.72                                   | 5.04 (4.78-5.31)  | 5.17 | 5.52 (5.24-5.79) |
| 2007 | 30067                          | 1513           | 5.03                                                                         | 5.39 (5.12-5.66) | 5.06                                   | 5.42 (5.15-5.69)  | 5.51 | 5.89 (5.61-6.17) |
| 2008 | 30365                          | 1645           | 5.42                                                                         | 5.81 (5.53-6.08) | 5.44                                   | 5.84 (5.56-6.11)  | 5.91 | 6.32 (6.03-6.60) |

\* Age-standardised to the age structure of the entire study population for the ten year period, excluding those with pre-existing diabetes

1  
2  
3 **Rising maternal age does not fully explain the increasing prevalence**  
4 **of diabetes in pregnancy trends in Victoria, Australia, 1999-2008.**  
5  
6

7 **Running title: Secular trends in prevalence of diabetes in pregnancy**  
8

9 **Marian Abouzeid<sup>1,2</sup>, Vincent L Versace<sup>1</sup>, Edward D Janus<sup>1,3</sup>, Mary-Ann**  
10 **Davey<sup>4,5</sup>, Benjamin Philpot<sup>1</sup>, Jeremy Oats<sup>4,6</sup>, James A Dunbar<sup>1</sup>**  
11

- 12 1. Greater Green Triangle University Department of Rural Health  
13 Flinders and Deakin Universities  
14 Warrnambool, Victoria, Australia
- 15 2. Department of Epidemiology and Preventive Medicine  
16 Monash University  
17 Victoria, Australia
- 18 3. Department of Medicine, Northwest Academic Centre  
19 The University of Melbourne and Western Health  
20 Victoria, Australia
- 21 4. Consultative Council on Obstetric and Paediatric Mortality and Morbidity,  
22 Clinical Councils Unit  
23 Department of Health  
24 Victoria, Australia
- 25 5. Judith Lumley Centre  
26 La Trobe University  
27 Victoria, Australia
- 28 6. Melbourne School of Population and Global Health  
29 The University of Melbourne  
30 Victoria, Australia

31  
32  
33 **Corresponding author**

34 Professor James Dunbar  
35 Greater Green Triangle University Department of Rural Health  
36 Flinders and Deakin Universities  
37 P.O Box 423, Warrnambool 3280  
38 Victoria, Australia  
39 PH: +61 3 5563 3504  
40 Fax: +61 3 5563 3144  
41 Email: [director@greaterhealth.org](mailto:director@greaterhealth.org)  
42  
43  
44  
45  
46  
47  
48  
49  
50  
51  
52  
53  
54  
55  
56  
57  
58  
59  
60

## Abstract

**Objectives:** This paper reports secular trends in diabetes in pregnancy in Victoria, Australia and examines the effect of including or excluding women with pre-existing diabetes on gestational diabetes (GDM) prevalence estimates.

**Design:** population-based observational study

**Setting:** all births in Victoria, Australia between 1999 and 2008

**Participants:** 634,932 pregnancies resulting in a birth registered with the Victorian Perinatal Data Collection

**Outcome measures:** crude and age-standardised secular trends in pre-existing diabetes and GDM prevalence; secular GDM trends by maternal birthplace; effects on GDM prevalence of including and excluding pre-existing diabetes from the denominator.

**Results:** Of the 634,932 pregnancies, 2954 (0.5%) occurred in women with pre-existing diabetes and 29,147 (4.6%) were complicated by GDM. Mean maternal age increased from 29.7 years in 1999 to 30.8 years in 2008. GDM prevalence increased in most maternal age groups. In 2008, age-standardised GDM prevalence was 31% higher than in 1999; secular increases were greater for Australian-born non-Indigenous (29% increase) than immigrant women (12.3% increase). The annual number of pregnancies in women with pre-existing diabetes almost doubled from 1999 to 2008 and prevalence increased from 0.4% to 0.6%. However including or excluding pre-existing diabetes had little effect on GDM prevalence estimates.

**Conclusions:** Pre-existing diabetes and GDM prevalence increased in Victoria between 1999 and 2008 and rising maternal age does not fully explain these trends. These findings have important implications for preventive initiatives. Including or excluding small numbers of women with pre-existing diabetes resulted in minimal

1  
2  
3 changes in GDM estimates. As pre-existing diabetes in young women increases, this  
4  
5 methodological issue will likely become important.  
6  
7  
8  
9  
10

### 11 12 13 14 15 16 **Strengths and limitations of this study**

- 17  
18 • This study reports secular trends in Australian population-level prevalence of pre-  
19 existing diabetes in pregnancy and GDM using data collected over ten years from  
20 a comprehensive perinatal database that captures virtually all births in the state.  
21 Recording of GDM and pre-existing diabetes in this database have been shown to  
22 be highly accurate.  
23  
24
- 25 • This paper also examines an important epidemiological issue of the effect of  
26 including or excluding the growing group of women with pre-existing diabetes on  
27 GDM prevalence estimates. This methodological consideration is likely to  
28 become increasingly important as the number of women with pre-existing  
29 diabetes increases.  
30  
31
- 32 • As this study uses population-level administrative data it is not possible to identify  
33 unscreened pregnancies and screening practice may have changed over time.  
34  
35  
36  
37  
38  
39  
40  
41  
42  
43  
44  
45  
46  
47  
48  
49  
50  
51  
52  
53  
54  
55  
56  
57  
58  
59  
60

## Introduction

True pregnancy-induced hyperglycemia differs from pre-existing maternal diabetes. Pregnancy is diabetogenic: insulin resistance increases with advancing gestation ~~to ensure glucose availability to the developing fetus~~. Maternal insulin secretion normally increases in response; if insufficient to overcome the insulin resistance, hyperglycemia occurs. Pre-pregnancy glycemic control is usually restored after delivery (1). This differs from pre-existing maternal type 1 and type 2 diabetes, which are neither induced by pregnancy nor resolve post-partum. Any form of diabetes in pregnancy increases risk of a range of adverse maternal and neonatal outcomes; risk of some such complications is greater with pre-existing diabetes (2, 3). Moreover, pre-existing maternal diabetes in pregnancy presents particular management issues (4).

By definition, gestational diabetes mellitus (GDM) describes glucose intolerance that begins or is first recognised during pregnancy (5). Therefore, GDM encompasses both true pregnancy-induced hyperglycemia and diabetes pre-dating pregnancy but previously undiagnosed. Pre-existing diabetes is confirmed if post-partum testing demonstrates persistent dysglycemia fulfilling non-pregnancy diagnostic thresholds for diabetes (6). However, antenatal records and birth reports, commonly used to ascertain GDM prevalence, are completed before these tests are conducted and their results known.

Prevalence of diagnosed pre-existing diabetes among pregnant women is generally increasing (3, 7-12). Recent secular increases in GDM burden have also been documented in Manitoba (13) and Ontario~~London~~, Canada (11), Tianjin, China (14) and Bahrain (15). From across the United States there are reports of increasing GDM

1  
2  
3 (9, 12, 16, 17), increases followed by a levelling off (18), no temporal changes (7) and  
4  
5 fluctuations in disease burden over time (19). In Australia, over recent decades rising  
6  
7 GDM burden has been reported (3, 20-23); trends in diabetes in pregnancy amongst  
8  
9 Indigenous Australian women are inconsistent (10, 20, 24-26).

10  
11  
12 There are several methodological issues surrounding GDM epidemiology, including  
13  
14 denominator selection (27). For example, Australian GDM studies have included in  
15  
16 the denominator all pregnant women/births/confinements (2, 3, 10, 20, 24-26, 28),  
17  
18 only singleton pregnancies (29, 30), only screened/tested pregnancies (22, 31),  
19  
20 excluded women with pre-existing diabetes (23, 30) and/or reported prevalence of all  
21  
22 forms of diabetes in pregnancy collectively (10, 24, 26). Similar methodological  
23  
24 variation exists internationally.  
25  
26  
27

28  
29 The International Association of Diabetes and Pregnancy Study Group (IADPSG)  
30  
31 recognises the issues associated with including women with pre-existing diabetes  
32  
33 together with those with 'true' GDM (32). New IADPSG recommendations advise  
34  
35 that all or high-risk women without known glucose abnormalities undergo fasting  
36  
37 plasma glucose (FPG), random plasma glucose (RPG) or hemoglobin A1c (HbA1c)  
38  
39 testing at the first antenatal visit. This is to identify 'overt' diabetes (FPG  
40  
41  $\geq 7.0$  mmol/L or HbA1c  $\geq 6.5\%$  or random plasma glucose  $\geq 11.1$  mmol/L and  
42  
43 confirmed with FPG or HbA1c result) and early-onset GDM (32). The Australasian  
44  
45 Diabetes in Pregnancy Society (ADIPS) recommends that high-risk women have a  
46  
47 75g oral glucose tolerance test (OGTT) as soon as possible after conception to detect  
48  
49 GDM (6). Both authorities recommend universal testing of remaining women using  
50  
51 OGTT at 24-28 weeks to identify additional cases (6, 32). The FPG level considered  
52  
53 diagnostic of GDM will be reduced from  $\geq 5.5$  mmol/L to  $\geq 5.1$  mmol/L, and the two-  
54  
55 hour plasma glucose threshold is to increase from  $\geq 8.0$  mmol/L to  $\geq 8.5$  mmol/L (6).  
56  
57  
58  
59  
60

1  
2  
3 These guidelines are expected to substantially increase the number of women  
4 diagnosed with GDM (33). The IADPSG and ADIPSG diagnostic criteria recommend  
5 dispensing with the Glucose Challenge Test (GCT). The GCT misses 25% of GDM  
6 cases and consequently adoption of this step alone is likely to be a significant  
7 contributor to the increased diagnostic rates of GDM (34). The IADPSG  
8 recommendations are also intended to increase detection of pre-existing diabetes. As  
9 diagnosed pre-existing diabetes rises, the methodology used to calculate GDM  
10 prevalence may influence the estimates due to differing denominator sizes,  
11 particularly amongst ethnic groups and in settings where pre-existing diabetes  
12 prevalence is high. Such variation has a range of potential implications, including for  
13 funding and health service planning.  
14  
15

16  
17  
18  
19  
20  
21  
22  
23  
24  
25  
26  
27  
28 No recent population-level Australian studies examine longitudinal trends in pre-  
29 existing maternal diabetes (3), and few report recent trends in burden of GDM overall  
30 (20, 23) or among various migrant groups (20). Using data routinely collected over  
31 ten years from the state of Victoria, Australia, we investigated firstly, secular trends in  
32 prevalence of pre-existing diabetes in pregnancy; secondly, trends in GDM burden;  
33 and finally, the effects of including and excluding women with pre-existing diabetes  
34 on GDM prevalence estimates.  
35  
36  
37  
38  
39  
40  
41  
42  
43  
44

### 45 **Methods**

46  
47 The Victorian Perinatal Data Collection (VPDC) is a population-based surveillance  
48 system, maintained by the Consultative Council on Obstetric and Paediatric Mortality  
49 and Morbidity, Victorian Department of Health. Information is routinely collected on  
50 all births of at least 20 weeks' gestation (or if gestation is not known, birthweight of at  
51 least 400g). Birth report forms are completed at delivery by a clinician; notification of  
52  
53  
54  
55  
56  
57  
58  
59  
60



1  
2  
3 births to the VPDC by hospitals, birthing centres and private midwife practitioners is  
4  
5 mandatory. Therefore, the database is considered to completely capture virtually all  
6  
7 births in Victoria that fulfil reporting requirements.  
8  
9

10 De-identified data were extracted for all notified births that occurred in Victoria  
11  
12 between 1 January 1999 and 31 December 2008. For pregnancies yielding more than  
13  
14 one birth (i.e. twins or more), only the birth record for the first-born infant was  
15  
16 extracted. Each entry therefore represents one pregnancy. As women may have had  
17  
18 more than one pregnancy during the study period, the same woman may be  
19  
20 represented in the data set multiple times. Variables used in this analysis were year of  
21  
22 delivery, maternal age at delivery (categorised into age groups of  $\leq 24$  years, 25-29,  
23  
24 30-34, 35-39,  $\geq 40$  years), parity, diabetes status (GDM, pre-existing maternal diabetes  
25  
26 not further specified, no diabetes), maternal Aboriginal and Torres Strait Islander (i.e.  
27  
28 Indigenous) status and maternal country of birth. Maternal country of birth was  
29  
30 reclassified into geographically-based regions using the Australian Bureau of  
31  
32 Statistics' *Standard Australian Classification of Countries*. This classification scheme  
33  
34 includes Australia in the group *Oceania and Antarctica*. However we categorised  
35  
36 Australian-born women separately into two additional groups: *Australian-born*  
37  
38 *Indigenous* and *Australian-born non-Indigenous*.  
39  
40  
41  
42  
43

44 Maternal diabetes status was assigned based on whether the clinician completing the  
45  
46 notification form ticked the checkboxes for GDM or pre-existing maternal diabetes.  
47  
48 Recording of GDM and pre-existing diabetes in the VPDC are reported to be 99.4%  
49  
50 and 99.8% accurate, respectively (35). Over the study period, Australian guidelines  
51  
52 recommended universal offer of GDM screening, with selective screening of high risk  
53  
54 women considered appropriate in resource limited or low prevalence settings.  
55  
56 Screening is performed at 26-28 weeks gestation and a positive result is a 1-hr venous  
57  
58  
59  
60

1  
2  
3 | plasma glucoseFPG level of  $\geq 7.8$  mmol/L after a morning, non-fasting 50g glucose  
4  
5 | load or  $\geq 8$  mmol/L after a morning, non-fasting 75g glucose load. Confirmation of  
6  
7 | GDM diagnosis after a positive screening test requires an OGTT at 26-30 weeks  
8  
9 | gestation with venous plasma glucose levels of  $\geq 5.5$  mmol/L at 0 hours and/or  
10  
11 |  $\geq 8$  mmol/L at 2 hours (5).  
12

### 13 14 15 *Statistical analyses*

16  
17  
18 | Maternal demographic characteristics over time were examined using descriptive  
19  
20 | statistics. Crude and age-standardised annual prevalence rates of pre-existing diabetes,  
21  
22 | GDM and all diabetes were calculated as a percentage of total annual pregnancies,  
23  
24 | using direct standardisation to the maternal age structure of the entire study  
25  
26 | population. GDM prevalence rates over time were further examined by maternal age  
27  
28 | group and region of birth. Small numbers precluded similar analyses for pre-existing  
29  
30 | diabetes. To examine the effect of denominator variation on overall GDM prevalence  
31  
32 | estimates, annual GDM prevalence rates were also calculated after excluding from the  
33  
34 | denominator pregnancies in women with pre-existing diabetes.  
35  
36

37  
38  
39 | Women who had more than one pregnancy during the study period were included in  
40  
41 | each year that they delivered. This approach, coupled with the fact that having  
42  
43 | diabetes of any form in pregnancy increases the likelihood of diabetes in subsequent  
44  
45 | pregnancies, meant that observations were not necessarily independent. As the  
46  
47 | assumption of independence that underlies tests for linear trend was not fulfilled, such  
48  
49 | analyses were not performed ~~on the full dataset~~, and age-standardised prevalence rates  
50  
51 | were considered significantly different if 95% confidence intervals did not overlap.  
52  
53 | For sensitivity analysis, annual prevalence rates of pre-existing diabetes, GDM and all  
54  
55  
56  
57  
58  
59  
60

1  
2  
3 diabetes were calculated after restricting to women giving birth for the first time, and  
4  
5 tests for linear trend were performed for this subgroup.  
6  
7

8 Data were analysed using Stata 11.0. Permission to access and analyse data was  
9 granted by the Consultative Council on Obstetric and Paediatric Mortality and  
10 Morbidity, Victorian Department of Health. The Flinders University Social and  
11 Behavioural Research ethics committee exempted this study from requiring ethics  
12 approval, as it involved analysis of existing de-identified data.  
13  
14  
15  
16  
17  
18  
19

## 20 **Results**

21  
22 During the ten-year study period, there were 634,932 pregnancies resulting in a birth  
23 registration with the VPDC (Table 1). In 2008 there were 15.7% more pregnancies  
24 than in 1999. Mean maternal age increased from 29.7 years in 1999 to 30.8 years in  
25 2008. The number of births to women aged 40 years and over was 91.3% higher in  
26 2008 than in 1999.  
27  
28  
29  
30  
31  
32  
33  
34

35 Maternal region of birth was known for 99.7% ( $n=632,805$ ) of pregnancies, of which  
36 74.6% occurred in Australian-born women of non-Indigenous descent (Table 1).  
37 There was an overall trend of an increasing number of pregnancies in women born in  
38 all regions, with the exception of North-West Europe and Southern and Eastern  
39 Europe where there was a decline. The trend of increasing pregnancies was  
40 particularly strong in women from Southern and Central Asia (Table 1). The number  
41 of women becoming pregnant for the first time increased during the study period with  
42 5,486 (22.1%) more first pregnancies recorded in 2008 compared with 1999 (Table  
43 1).  
44  
45  
46  
47  
48  
49  
50  
51  
52  
53  
54

### 55 ***Diabetes in pregnancy***

1  
2  
3 In 2008, 6.1% of all pregnancies were complicated by some form of diabetes,  
4 compared with 4.3% in 1999 (Table 2). Each year, pregnancies occurring in older  
5 women (those aged 35-39 years and 40 years or older) had higher prevalence of any  
6 form of diabetes than pregnancies in younger women (data not shown).  
7  
8  
9  
10

### 11 ***Prevalence of pre-existing maternal diabetes in pregnancy***

12  
13  
14  
15 Between 1999 and 2008, 2,954 pregnancies (0.5%) occurred in women with known  
16 pre-existing diabetes. The prevalence rate of pre-existing diabetes increased from  
17 0.4% to 0.6%, representing an increase of 50% over the study period and there was  
18 little difference between the crude and age-standardised estimates (Figure 1a). The  
19 absolute annual number of pregnancies in women with pre-existing diabetes almost  
20 doubled over this period.  
21  
22  
23  
24  
25  
26  
27  
28

29  
30 For the entire ten-year period, the greatest absolute number of pregnancies in women  
31 with pre-existing diabetes occurred in Australian-born non-Indigenous women, and  
32 for the migrant groups, in those born in South-East Asia and Southern and Central  
33 Asia; pre-existing diabetes prevalence rates were however highest in pregnancies  
34 among women born in Southern and Central Asia and Sub-Saharan Africa (data not  
35 shown).  
36  
37  
38  
39  
40  
41  
42  
43

### 44 ***Prevalence of GDM***

45  
46  
47 Of all pregnancies in Victoria from 1999 to 2008, 29,147 (4.6%) were complicated by  
48 GDM. Overall, the annual number of GDM pregnancies increased by 64% between  
49 1999 and 2008. Increases in the absolute number of GDM pregnancies over time were  
50 apparent in all but the youngest group of women (Fig. 1b). GDM also increased as a  
51 proportion of total pregnancies, such that in 2008, the age-standardised GDM  
52  
53  
54  
55  
56  
57  
58  
59  
60

1  
2  
3 prevalence rate was 31% higher than in 1999 (Table 2). Over the study period, crude  
4  
5 GDM prevalence rates tended to increase in pregnancies among women in most age  
6  
7 groups (Figure 1c). Analysis of data from women in their first pregnancy who did not  
8  
9 have pre-existing diabetes revealed a significant positive **linear** trend in the prevalence  
10  
11 of the crude ( $p<0.001$ ) and age-standardised ( $p<0.001$ ) rates of GDM over the study  
12  
13 period.  
14

15  
16  
17 Considerable differences in GDM prevalence rates existed by maternal region of birth  
18  
19 (Figure 2). Prevalence increased over time, both amongst Australian-born non-  
20  
21 Indigenous women and overseas-born women considered collectively. However, the  
22  
23 same pattern was not evident when considering Indigenous Australians and each  
24  
25 migrant group individually. The extent of the changes in GDM prevalence rates over  
26  
27 time varied by migrant origin status. In Australian-born non-Indigenous women, age-  
28  
29 standardised GDM prevalence in 2007 and 2008 was 29% higher than in 1999 and  
30  
31 2000 (4.0% vs. 3.1%), whereas amongst all overseas-born women collectively,  
32  
33 prevalence increased by 12.3% between these two time periods (8.2% vs. 7.3%;  
34  
35 Figure 2) with differences between the various groups.  
36  
37  
38  
39

#### 40 *Effect of denominator variation*

41  
42  
43 Including or excluding women with pre-existing diabetes had little effect on GDM  
44  
45 prevalence rates overall (Table 2). Estimates were generally similar, albeit lower,  
46  
47 when considering only women in their first pregnancy (Supplementary Table 1).  
48  
49 Including or excluding women with pre-existing diabetes also had very little effect on  
50  
51 GDM prevalence rates by maternal region of birth (data not shown).  
52  
53  
54

#### 55 **Discussion**

1  
2  
3 Prevalence of both pre-existing diabetes in pregnancy and GDM increased in  
4 Victoria, Australia over the period 1999 to 2008. The number of births to older  
5 mothers increased over the study period, almost doubling for those aged 40 years and  
6 over. However, age-standardising had little effect on prevalence rates, and GDM  
7 prevalence increased within most maternal age groups, indicating that rising maternal  
8 age does not fully explain the upward trends. GDM prevalence increased to a greater  
9 extent in pregnancies amongst Australian-born non-Indigenous women compared  
10 with rates in all overseas-born women. Consistent with existing knowledge (20, 22,  
11 23, 28-31), pregnancies occurring in women born throughout Asia and in North  
12 Africa and the Middle East had the highest GDM rates.

13  
14  
15  
16  
17  
18  
19  
20  
21  
22  
23  
24  
25  
26 Similar to recent reports of rising trends in GDM burden nationally (20) and in the  
27 multiethnic state of New South Wales (3, 23), we noted a pronounced increase in  
28 overall GDM prevalence in Victoria from 1999 to 2008. This may reflect secular  
29 increases in obesity prevalence in the general population (36); effects of obesity could  
30 not be examined as maternal pre-pregnancy body mass index (BMI) was not recorded  
31 in the VPDC during the study period. BMI trend data in Australian obstetric patients  
32 are sparse and generally from single centers ([for example, 37](#)). ~~Internationally, the~~  
33 ~~extent to which rising diabetes burden in pregnancy is explained by changing BMI~~  
34 ~~distribution varies (11, 17). Maternal BMI has been recorded in the VPDC since~~  
35 ~~2009; f~~ Further research is required in the Australian context when population-level  
36 obstetric BMI trend data become available.

37  
38  
39  
40  
41  
42  
43  
44  
45  
46  
47  
48  
49  
50  
51 ~~Similar to reports from the United States, where diabetes rates among delivery~~  
52 ~~hospitalisations increased among mothers of all ages but most notably in younger~~  
53 ~~women (12),~~ In our study GDM prevalence increased across most maternal age  
54 groups. This and the fact that results were generally similar when restricting to  
55  
56  
57  
58  
59  
60

1  
2  
3 primiparous women indicates that factors other than those examined in this study  
4 likely largely account for the observed trends. In the general Australian population,  
5 prevalence of overweight/obesity has increased across most age groups over time (38)  
6 and this may be contributing to the rising GDM prevalence observed in our study  
7 among most groups including the younger mothers. Rising GDM prevalence may also  
8 reflect increases in pre-existing but previously undiagnosed diabetes; as postnatal  
9 OGTT results were not available, the extent to which this is the case cannot be  
10 established. Additionally, GDM ascertainment may be influenced by systemic factors,  
11 which themselves may change over time. In particular, screening and diagnostic  
12 practices and uptake rates will influence case detection. For example, after  
13 introduction of universal OGTT testing in a regional hospital in northern Australia,  
14 testing rates in Indigenous Australian women increased from 31.4% in 2006 to 65.6%  
15 in 2008 and GDM rates tripled (26).  
16  
17  
18  
19  
20  
21  
22  
23  
24  
25  
26  
27  
28  
29  
30  
31

32 This study has demonstrated that migrant disparities in GDM prevalence appear to be  
33 diminishing, but in a concerning rather than desirable manner:- increases in GDM  
34 prevalence rates over time were most pronounced in Australian-born non-Indigenous  
35 women, among whom GDM prevalence was converging with the higher rates in  
36 overseas-born mothers. A similar phenomenon closing the gap in burden of diabetes  
37 in pregnancy between high rate Indigenous and increasingly higher rate non-  
38 Indigenous Australian women has also been previously described (20, 24). The  
39 desired key to reducing overall disease burden and socio-cultural inequities is to close  
40 the gap by reducing prevalence among high risk groups and to contain and ideally  
41 reduce the prevalence among lower risk groups. Our findings differ from recent  
42 national reports that GDM increased to a similar extent amongst Australian-born  
43 (23% increase) and all overseas-born mothers collectively (24% increase), with  
44  
45  
46  
47  
48  
49  
50  
51  
52  
53  
54  
55  
56  
57  
58  
59  
60

1  
2  
3 differential increases between individual migrant groups, for the period 2000-01 and  
4  
5 2005-06 (20). That GDM burden in Victoria increased over time amongst all migrant  
6  
7 groups collectively but not individually may be due to the fact that the proportion of  
8  
9 mothers born in high prevalence regions and giving birth in Victoria has increased  
10  
11 over time (39), but our study may have been underpowered to detect differences  
12  
13 within individual migrant groups. Alternatively, it is possible that risk factor  
14  
15 distribution or screening uptake may have changed more over time for some groups  
16  
17 than others, or that there is a difference in the proportion of diagnosed to undiagnosed  
18  
19 diabetes between migrants and local-born women. Future research should seek to  
20  
21 confirm our results and investigate underlying causes.  
22  
23  
24

25  
26 In contrast to earlier findings (3), recent work suggests that in the Australian obstetric  
27  
28 population, pre-existing type 2 diabetes is now as common as type 1 diabetes (2), and  
29  
30 even the predominant form of pre-existing diabetes in pregnancy (40). The increasing  
31  
32 number of pregnancies in women with pre-existing diabetes observed in our study is  
33  
34 consistent with international findings (7-9, 11, 12) and reinforces the urgent need for  
35  
36 population-level preventive initiatives to address the growing public health problem  
37  
38 of diabetes in the young. These upward trends are likely to continue, particularly in  
39  
40 the setting of the obesity and type 2 diabetes epidemics in the general population (36),  
41  
42 evidence of earlier onset of type 2 diabetes, trends toward delayed childbearing (39);  
43  
44 ~~increasing use of assisted reproductive technologies by older women and/or those~~  
45  
46 ~~with pre-existing diabetes and attendant subfertility,~~ and introduction of new antenatal  
47  
48 screening guidelines (6, 32) that will increase case detection.  
49  
50  
51  
52

53  
54 There are a number of strengths to this study. This is one of few papers to report  
55  
56 secular trends in Australian population-level prevalence of pre-existing diabetes in  
57  
58 pregnancy (3) and to our knowledge, the only one to present data spanning a decade.  
59  
60



1  
2  
3 It is also one of few Australian studies, and the first from Victoria since the early  
4  
5 1990s, to report ethno-specific secular trends in GDM prevalence. This is important  
6  
7 because of Australia's diverse and evolving multi-ethnic demography. Others have  
8  
9 reported their GDM prevalences after excluding pre-existing diabetes as sensitivity  
10  
11 analysis (19) but as far as we are aware, our paper is the first to specifically examine  
12  
13 using a single database the effect of including or excluding the growing group of  
14  
15 women with pre-existing diabetes on GDM prevalence estimates, in important  
16  
17 subgroups such as region of birth where denominator variation plausibly might have  
18  
19 an effect. This methodological issue is likely to become increasingly relevant, with  
20  
21 implications for service planning and delivery and preventive efforts worldwide.  
22  
23  
24  
25

26 The data source was a comprehensive population-level perinatal data collection. Case  
27  
28 ascertainment depends on accurate completion of birth report forms - training  
29  
30 manuals exist to facilitate this. Data collection forms did not change over the study  
31  
32 period, with GDM and pre-existing diabetes status recorded consistently using  
33  
34 checkboxes; this reduces the likelihood of ascertainment bias over time.  
35  
36  
37

38 Study limitations should be noted. Australian guidelines over the study period  
39  
40 recommended universal screening for GDM, with selective screening to be considered  
41  
42 in settings with limited resources or low GDM burden (5). As it is not possible to  
43  
44 identify unscreened pregnancies in our data, all pregnancies yielding births that were  
45  
46 reported to the VPDC during the study period were included in this analysis. Some  
47  
48 women may not have been tested for GDM, so our rates are minimum estimates.  
49  
50 Screening practice may have varied between clinicians and centers. For example, in  
51  
52 1999 there was considerable variation in GDM testing in Australian hospitals,  
53  
54 including differences in the universal versus selective offer of screening and the  
55  
56 testing protocols used (41). Testing practices within centers may also have changed  
57  
58  
59  
60

1  
2  
3 over time (26). To enable identification of screened pregnancies, we suggest that  
4 information on diabetes testing status should be collected in perinatal data sets.  
5  
6

7 Finally, the region of birth classifications used in this study were necessarily broad  
8  
9 and may mask heterogeneity within and between groups. Women may have been  
10 born in Australia but have the behavioural and biological risk factor profiles of their  
11 ethnic group of origin; ethnicity data are not captured in the VPDC so it is not  
12 possible to ascertain the extent to which this is the case.  
13  
14  
15  
16  
17  
18

19 In summary, prevalence of both pre-existing diabetes and GDM increased among the  
20  
21 Victorian obstetric population between 1999 and 2008 and these increases are not  
22  
23 fully explained by rising maternal age. GDM prevalence increased at a greater rate  
24  
25 amongst Australian-born non-Indigenous women than among migrant women. These  
26  
27 findings have important implications across all levels of the healthcare system, from  
28  
29 the primary prevention sphere to pre-pregnancy counselling and antenatal clinical  
30  
31 service provision, through to postnatal management of both mother and infant and  
32  
33 tertiary prevention and monitoring. As such, these results have clear implications for  
34  
35 clinicians, who need to be aware of the socio-cultural distribution of GDM and  
36  
37 actively managing women at risk. This information is also important for  
38  
39 policymakers and the public health profession, both to guide preventive initiatives and  
40  
41 to facilitate health service planning in the face of an increasing morbidity burden for  
42  
43 mothers and offspring as prevalence of GDM and pre-existing diabetes increase.  
44  
45 Given the health risks conferred on infants of pregnancies complicated by diabetes,  
46  
47 addressing the rising burden of diabetes of any form in pregnancy is essential if we  
48  
49 are to break the cycle of intergenerational diabetes transmission and reverse the  
50  
51 direction and slope of trend graphs in future.  
52  
53  
54  
55  
56  
57  
58  
59  
60

1  
2  
3 Finally, there has been debate surrounding many aspects of GDM epidemiology, but  
4  
5 the issue of denominator variation is one that appears to have been overlooked, yet  
6  
7 warrants consideration. Although having negligible effect in our data set given low  
8  
9 rates of pre-existing diabetes, to include pre-existing diabetes in the denominator  
10  
11 could potentially underestimate GDM prevalence; to exclude pre-existing cases could  
12  
13 underestimate the total burden of diabetes in pregnancy. These issues should come to  
14  
15 the attention of expert groups: a consistent approach is required, in order to accurately  
16  
17 gauge disease burden, compare prevalence within and between populations, and  
18  
19 monitor trends. Perhaps the best approach is to report prevalence of both GDM and  
20  
21 pre-existing diabetes separately. Particularly given the looming rise in diagnosed  
22  
23 cases of pre-existing disease, measurement methodology will increasingly matter.  
24  
25  
26  
27  
28  
29  
30

### 31 **Contributors**

32  
33 MA conceived and designed the study, assisted with data analysis and interpretation,  
34  
35 wrote and edited manuscript; VV analysed and interpreted data, edited manuscript;  
36  
37 EDJ designed the study, edited manuscript; M.-A.D designed the study, analysed and  
38  
39 interpreted data, edited manuscript; BP conceived and designed the study, analysed  
40  
41 and interpreted data; JO edited manuscript; JD conceived and designed the study,  
42  
43 edited manuscript, supervised the study and is the guarantor.  
44  
45  
46  
47  
48

49 Some findings from these data were presented as a poster at the 6th International  
50  
51 Symposium on Diabetes and Pregnancy conference in Salzburg, Austria in March  
52  
53 2011.  
54  
55  
56  
57  
58  
59  
60

**Funding:** This research received no specific grant from any funding agency in the public, commercial or not-for-profit sectors.

**Competing interests:** none

**Data sharing statement:** The statistical code used to generate the results in this article is available from the corresponding author upon request. The custodian of the dataset used in this article is the Consultative Council on Obstetric and Paediatric Mortality and Morbidity (CCOPMM). All enquiries to access this dataset should be directed to CCOPMM.

## REFERENCES

1. Hodson K, Robson S, Taylor R. Gestational diabetes: emerging concepts in pathophysiology. *Obstetric Medicine*. 2010;3(4):128-32.
2. Australian Institute of Health and Welfare. Diabetes in pregnancy: its impact on Australian women and their babies. Diabetes series no. 14. Cat. no. CVD 52. Canberra: AIHW; 2010.
3. Shand AW, Bell JC, McElduff A, ~~et al~~ ~~Morris J, Roberts CL~~. Outcomes of pregnancies in women with pre-gestational diabetes mellitus and gestational diabetes mellitus; a population-based study in New South Wales, Australia, 1998-2002. *Diabetic Medicine*. 2008;25:708-15.
4. McElduff A, Cheung NW, McIntyre HD, ~~Lagstrom JA, Oats JN, Ross GP~~, et al. The Australasian Diabetes in Pregnancy Society consensus guidelines for the management of type 1 and type 2 diabetes in relation to pregnancy. *Medical Journal of Australia*. 2005;183(7):373-7.
5. Hoffman L, Nolan C, Wilson JD, ~~et al~~ ~~Oats JN, Simmons D~~. Gestational diabetes mellitus -- management guidelines. The Australasian Diabetes in Pregnancy Society. *Medical Journal of Australia*. 1998;169(2):93-7.
6. Nankervis A, McIntyre HD, Moses R, ~~Ross GP, Callaway L, Porter C~~, et al. Australasian Diabetes in Pregnancy Society (ADIPS) consensus guidelines for the testing and diagnosis of gestational diabetes mellitus in Australia. 2013; [Version 2:3/5/13](#).
7. Lawrence JM, Contreras R, Chen W, ~~et al~~ ~~Sacks DA~~. Trends in the prevalence of preexisting diabetes and gestational diabetes mellitus among a racially/ethnically diverse population of pregnant women, 1999-2005. *Diabetes Care*. 2008;31(5):899-904.
8. Bell R, Bailey K, Cresswell T, ~~Hawthorne G, Critchley J, Lewis-Barned N~~, et al. Trends in prevalence and outcomes of pregnancy in women with pre-existing type I and type II diabetes. *BJOG: An International Journal of Obstetrics & Gynaecology*. 2008;115(4):445-52.
9. Thorpe LE, Berger D, Ellis JA, ~~Bettegowda VR, Brown G, Matte T~~, et al. Trends and racial/ethnic disparities in gestational diabetes among pregnant women in New York City, 1990-2001. *Am J Public Health*. 2005-~~Sep~~;95(9):1536-9.
10. Falhammar H, Davis B, Bond D, ~~et al~~ ~~Sinha AK~~. Maternal and neonatal outcomes in the Torres Strait Islands with a sixfold increase in type 2 diabetes in pregnancy over six years. *Aust N Z J Obstet Gynaecol*. 2010;50:120-6.

11. [Feig, DS, Hwee J, Shah BR, et al. Trends in incidence of diabetes in pregnancy and serious perinatal outcomes: a large, population-based study in Ontario, Canada, 1996-2010. Diabetes Care. 2014;37\(6\):1590-6](#)[Davenport MH, Campbell MK, Mottola MF. Increased incidence of glucose disorders during pregnancy is not explained by pre-pregnancy obesity in London, Canada. BMC Pregnancy and Childbirth. 2010;10:85.](#)
12. Albrecht SS, Kuklina EV, Bansil P, ~~Jamieson DJ, Whiteman MK, Kourtis AP~~, et al. Diabetes trends among delivery hospitalisations in the U.S., 1994-2004. *Diabetes Care*. 2010;33(4):768-73.
13. Aljohani N, Rempel BM, Ludwig S, ~~Morris M, McQuillen K, Cheang M~~, et al. Gestational diabetes in Manitoba during a twenty-year period. *Clin Invest Med*. 2008;31(3):E131-E7.
14. Zhang F, Dong L, Zhang CP, ~~Li B, Wen J, Gao W~~, et al. Increasing prevalence of gestational diabetes mellitus in Chinese women from 1999 to 2008. *Diabetic Medicine*. 2011;28(6):652-7.
15. Rajab KE, Issa AA, Hasan ZA, ~~et al Rajab E, Jaradat AA~~. Incidence of gestational diabetes mellitus in Bahrain from 2002 to 2010. *International Journal of Gynecology & Obstetrics*. 2012;117(1):74-7.
16. Getahun D, Nath C, Ananth CV, ~~et al Chavez MR, Smulian JC~~. Gestational diabetes in the United States: temporal trends 1989 through 2004. *American Journal of Obstetrics & Gynecology*. 2008;198(5).
17. Lu GC, Rouse DJ, DuBard M, ~~et al Cliver SP, Kimberlin D, Hauth JC~~. The effect of the increasing prevalence of maternal obesity on perinatal morbidity. *American Journal of Obstetrics & Gynecology*. 2001;185(4):845-9.
18. Ferrara A, Kahn HS, Quesenberry CP, ~~et al Riley C, Hedderson MM~~. An increase in the incidence of gestational diabetes mellitus: Northern California, 1991-2000. *Obstet Gynecol*. 2004 ~~Mar~~;103(3):526-33.
19. Wang Y, Chen L, Xiao K, ~~Horswell R, Besse J, Johnson J~~, et al. Increasing incidence of gestational diabetes mellitus in Louisiana, 1997-2009. *Journal of Women's Health*. [2012;21\(3\)319-252011](#).
20. Templeton M, Pieris-Caldwell I. Gestational diabetes mellitus in Australia, 2005-06. Diabetes series no. 10. Cat. no. CVD 44. Canberra: AIHW; 2008.
21. Henry OA, Beischer NA, Sheedy MT, ~~et al Walstab JE~~. Gestational diabetes and follow-up among immigrant Vietnam-born women. *The Australian and New Zealand Journal of Obstetrics and Gynaecology*. 1993;33(2):109-14.
22. Beischer NA, Oats JN, Henry OA, ~~et al Sheedy MT, Walstab JE~~. Incidence and severity of gestational diabetes mellitus according to country of birth in women living in Australia. *Diabetes*. 1991;2:35-8.
23. Anna V, van der Ploeg HP, Wah Cheung N, ~~et al Huxley RR, Bauman AE~~. Sociodemographic correlates of the increasing trend in prevalence of gestational diabetes mellitus in a large population of women between 1995 and 2005. *Diabetes Care*. 2008;31(12):2288-93.
24. Ishak M, Petocz P. Gestational diabetes among Aboriginal Australians: prevalence, time trend and comparisons with non-Aboriginal Australians. *Ethnicity and Disease*. 2003;13(Winter 2003):55-60.
25. Kim SY, Humphrey MD. Decrease in incidence of gestational diabetes mellitus in Far North Queensland between 1992 and 1996. *Aust NZ J Obstet Gynaecol*. 1999;39(1):40-3.
26. Davis B, McLean A, Sinha AK, ~~et al Falhammar H~~. A threefold increase in gestational diabetes over two years: Review of screening practices and pregnancy outcomes in Indigenous women of Cape York, Australia. *Australian and New Zealand Journal of Obstetrics and Gynaecology*. 2013;53:363-8.

- 1  
2  
3 27. Ferrara A. Increasing prevalence of gestational diabetes mellitus. A public health  
4 perspective. *Diabetes Care*. 2007;30(S2):S141-S6.
- 5 28. Carolan M, Davey M-A, Biro MA, ~~et al~~Kealy M. Maternal age, ethnicity and  
6 gestational diabetes mellitus. *Midwifery*. 2012; ~~28~~1(6):778-83(0).
- 7 29. Stone CA, McLachlan KA, Halliday JL, ~~et al~~Wein P, Tippett C. Gestational diabetes in  
8 Victoria in 1996: incidence, risk factors and outcomes. *Medical Journal of Australia*.  
9 2002;177:486-91.
- 10 30. Teh WT, Teede HJ, Paul E, ~~et al~~Harrison CL, Wallace EM, Allan C. Risk factors for  
11 gestational diabetes mellitus: Implications for the application of screening guidelines.  
12 *Australian and New Zealand Journal of Obstetrics and Gynaecology*. 2011;51:26-30.
- 13 31. Moses RG, Griffiths RD, McPherson S. The incidence of gestational diabetes mellitus  
14 in the Illawarra area of New South Wales. *Australian & New Zealand Journal of Obstetrics &  
15 Gynaecology*. 1994;34(4):425-7.
- 16 32. International Association of Diabetes in Pregnancy Study Groups Consensus Panel.  
17 International Association of Diabetes and Pregnancy Study Groups Recommendations on the  
18 Diagnosis and Classification of Hyperglycemia in Pregnancy. *Diabetes Care*. 2010 March 1,  
19 2010;33(3):676-82.
- 20 33. Moses RG, Morris GJ, Petocz P, ~~et al~~San Gil F, Garg D. The impact of potential new  
21 diagnostic criteria on the prevalence of gestational diabetes mellitus in Australia. *Medical  
22 Journal of Australia*. 2011;194(7):338-40.
- 23 34. McIntyre HD. Diagnosing gestational diabetes mellitus: rationed or rationally related  
24 to risk? *Diabetes Care*. 2013;36(10):2879-80.
- 25 35. Davey M-A, Sloan M-L, Palma S, ~~et al~~Riley M, King J. Methodological processes in  
26 validating and analysing the quality of population-based data: a case study using the  
27 Victorian Perinatal Data Collection. *Health Information Management Journal*. 2013;42(3):12-  
28 9.
- 29 36. Department of Health ~~2011~~Victoria. Victorian population health survey 2009. [State  
30 Government of Victoria: Melbourne](http://www.health.vic.gov.au/healthstatus/survey/vphs2009.htm). Available from:  
31 <http://www.health.vic.gov.au/healthstatus/survey/vphs2009.htm>.
- 32 37. McIntyre HD, Gibbons KS, Flenady VJ, ~~et al~~Callaway LK. Overweight and obesity in  
33 Australian mothers: epidemic or endemic? *Medical Journal of Australia*. 2012;196(3):184-8.
- 34 38. Australian Institute of Health and Welfare. Risk factor trends: age patterns in key  
35 health risks over time. Cat. no. PHE 166. Canberra: AIHW 2012.
- 36 39. Consultative Council on Obstetric and Paediatric Mortality and Morbidity. Births in  
37 Victoria 2007 and 2008. Melbourne: Department of Health 2010.
- 38 40. McElduff A, Ross GP, Lagstrom JA, ~~Champion B, Flack JR, Lau S-L~~, et al. Pregestational  
39 diabetes and pregnancy. An Australian experience. *Diabetes Care*. 2005;28(5):1260.
- 40 41. Rumbold AR, Crowther CA. Guideline use for gestational diabetes mellitus and  
41 current screening, diagnostic and management practices in Australian hospitals. *Australian  
42 and New Zealand Journal of Obstetrics and Gynaecology*. 2001;41(1):86-90.
- 43  
44  
45  
46  
47  
48  
49  
50  
51  
52  
53  
54  
55  
56  
57  
58  
59  
60

**Table 1: Maternal demographic characteristics for pregnancies yielding births notified to the Victorian Perinatal Data Collection by year of delivery, Victoria 1999-2008.\***

|                                    | Year of delivery |        |        |        |        |        |        |        |        |        | Total<br>1999-2008 |
|------------------------------------|------------------|--------|--------|--------|--------|--------|--------|--------|--------|--------|--------------------|
|                                    | 1999             | 2000   | 2001   | 2002   | 2003   | 2004   | 2005   | 2006   | 2007   | 2008   |                    |
| <b>Maternal age group (N)</b>      |                  |        |        |        |        |        |        |        |        |        |                    |
| <=24 years                         | 9768             | 9363   | 9270   | 9152   | 8903   | 8644   | 8895   | 9445   | 9619   | 9762   | 92821              |
| 25-29 years                        | 19074            | 18537  | 17283  | 16535  | 16241  | 15740  | 16213  | 16739  | 17652  | 17583  | 171597             |
| 30-34 years                        | 20485            | 20957  | 21667  | 22615  | 23050  | 23119  | 23748  | 24447  | 24475  | 24021  | 228584             |
| 35-39 years                        | 9456             | 9839   | 9895   | 10563  | 10796  | 11534  | 12765  | 13859  | 15137  | 15420  | 119264             |
| >=40 years                         | 1641             | 1731   | 1879   | 1981   | 2117   | 2241   | 2393   | 2658   | 2854   | 3139   | 22634              |
| <b>Total</b>                       | 60424            | 60427  | 59994  | 60846  | 61107  | 61278  | 64014  | 67148  | 69737  | 69925  | 634900             |
| <b>% aged &gt;30</b>               | 52.27            | 53.83  | 55.74  | 57.78  | 58.85  | 60.21  | 60.78  | 61.01  | 60.89  | 60.89  | 58.33              |
| <b>Parity</b>                      |                  |        |        |        |        |        |        |        |        |        |                    |
| 1                                  | 24,879           | 25,242 | 24,662 | 25,511 | 26,015 | 26,328 | 27,568 | 29,024 | 30,066 | 30,362 | 269,657            |
| 2 or higher                        | 35,545           | 35,185 | 35,332 | 35,335 | 35,091 | 34,950 | 36,446 | 38,124 | 39,671 | 39,563 | 365,242            |
| <b>Region of birth<sup>†</sup></b> |                  |        |        |        |        |        |        |        |        |        |                    |
| Australia (non-Indigenous)         | 45,573           | 45,258 | 45,236 | 46,076 | 46,014 | 45,985 | 47,715 | 49,764 | 50,342 | 50,042 | 472,005            |
| Oceania                            | 1,496            | 1,488  | 1,626  | 1,566  | 1,663  | 1,636  | 1,685  | 1,838  | 1,846  | 1,974  | 16,818             |
| North-West Europe                  | 2,565            | 2,438  | 2,353  | 2,275  | 2,134  | 2,127  | 2,156  | 2,250  | 2,400  | 2,213  | 22,911             |
| Southern & Eastern Europe          | 1,821            | 1,700  | 1,595  | 1,527  | 1,611  | 1,440  | 1,468  | 1,477  | 1,562  | 1,451  | 15,652             |
| North Africa & Middle East         | 1,630            | 1,573  | 1,537  | 1,581  | 1,669  | 1,684  | 1,889  | 1,979  | 1,997  | 2,146  | 17,685             |
| South-East Asia                    | 3,234            | 3,667  | 3,304  | 3,364  | 3,506  | 3,419  | 3,427  | 3,598  | 4,053  | 4,113  | 35,685             |
| North-East Asia                    | 1,158            | 1,256  | 1,080  | 1,125  | 1,061  | 1,122  | 1,148  | 1,305  | 1,691  | 1,704  | 12,650             |
| Southern & Central Asia            | 1,125            | 1,184  | 1,194  | 1,228  | 1,346  | 1,512  | 1,793  | 2,195  | 2,675  | 3,251  | 17,503             |
| Americas                           | 651              | 693    | 721    | 734    | 691    | 744    | 806    | 840    | 864    | 846    | 7,590              |
| Sub-Saharan Africa                 | 708              | 765    | 863    | 854    | 905    | 990    | 1,152  | 1,145  | 1,260  | 1,248  | 9,890              |
| Australia (Indigenous)             | 397              | 325    | 358    | 366    | 326    | 394    | 463    | 501    | 628    | 658    | 4,416              |

\* Includes women who had more than one pregnancy during the study period; 32 births had no information on age of mother and one birth had no information on parity

† Of the 634,932 registered births 2127 recorded the maternal region of birth as unknown.

Table 2: Crude and age-standardised prevalence of GDM by year of delivery and denominator, Victoria 1999-2008

| Year | <i>n</i><br>(all births) | <i>n</i><br>(GDM) | GDM /all pregnancies (%) |                  | GDM/all pregnancies less<br>pre-existing (%) |                       | All forms of diabetes in<br>pregnancy (%) |                  |
|------|--------------------------|-------------------|--------------------------|------------------|----------------------------------------------|-----------------------|-------------------------------------------|------------------|
|      |                          |                   | Crude                    | Age-standardised | Crude                                        | Age-<br>standardised* | Crude                                     | Age-standardised |
| 1999 | 60424                    | 2356              | 3.90                     | 4.10 (3.94-4.26) | 3.91                                         | 4.11 (3.95-4.28)      | 4.27                                      | 4.48 (4.31-4.65) |
| 2000 | 60431                    | 2548              | 4.22                     | 4.38 (4.21-4.55) | 4.23                                         | 4.39 (4.23-4.56)      | 4.56                                      | 4.73 (4.56-4.90) |
| 2001 | 59997                    | 2593              | 4.32                     | 4.43 (4.26-4.60) | 4.34                                         | 4.45 (4.28-4.61)      | 4.71                                      | 4.82 (4.65-5.00) |
| 2002 | 60847                    | 2752              | 4.52                     | 4.58 (4.41-4.74) | 4.54                                         | 4.59 (4.43-4.76)      | 4.95                                      | 5.00 (4.83-5.18) |
| 2003 | 61111                    | 2611              | 4.27                     | 4.29 (4.13-4.46) | 4.29                                         | 4.31 (4.15-4.47)      | 4.71                                      | 4.73 (4.56-4.90) |
| 2004 | 61283                    | 2547              | 4.16                     | 4.13 (3.97-4.29) | 4.17                                         | 4.15 (3.99-4.31)      | 4.61                                      | 4.58 (4.42-4.75) |
| 2005 | 64022                    | 3027              | 4.73                     | 4.66 (4.50-4.83) | 4.75                                         | 4.69 (4.52-4.85)      | 5.24                                      | 5.17 (5.00-5.34) |
| 2006 | 67150                    | 3295              | 4.91                     | 4.82 (4.66-4.98) | 4.93                                         | 4.85 (4.69-5.01)      | 5.43                                      | 5.34 (5.17-5.51) |
| 2007 | 69738                    | 3559              | 5.10                     | 4.98 (4.82-5.14) | 5.13                                         | 5.01 (4.85-5.17)      | 5.67                                      | 5.53 (5.37-5.70) |
| 2008 | 69929                    | 3859              | 5.52                     | 5.37 (5.21-5.54) | 5.55                                         | 5.40 (5.24-5.57)      | 6.12                                      | 5.96 (5.78-6.13) |

\* Age-standardised to the age structure of the entire study population for the ten year period, excluding those with pre-existing diabetes



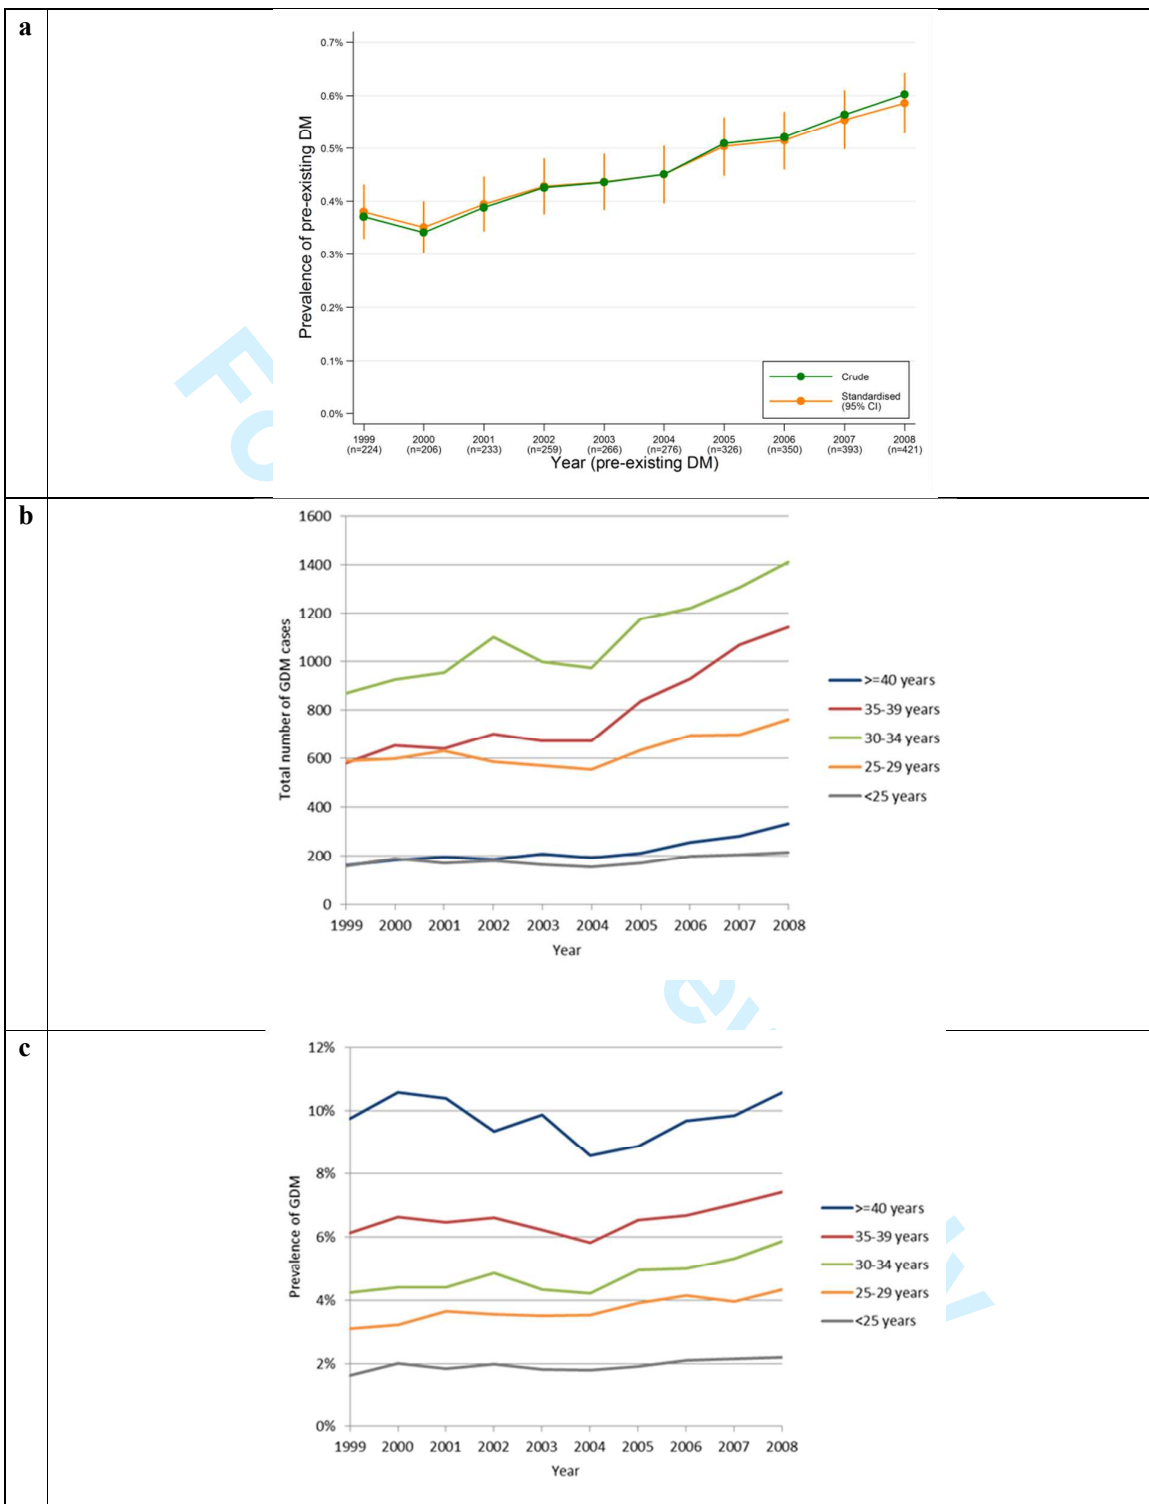

**Figure 1: (a) Crude and age-standardised prevalence of pre-existing maternal diabetes in pregnancy by year of delivery, Victoria 1999-2008; (b) Crude number of GDM cases by year of delivery and maternal age group, Victoria 1999-2008; (c) Crude GDM prevalence rates\* by year of delivery and maternal age group, Victoria 1999-2008.**

\* the denominator used to calculate prevalence of GDM is all pregnancies

1  
2  
3  
4  
5  
6  
7  
8  
9  
10  
11  
12  
13  
14  
15  
16  
17  
18  
19  
20  
21  
22  
23  
24  
25  
26  
27  
28  
29  
30  
31  
32  
33  
34  
35  
36  
37  
38  
39  
40  
41  
42  
43  
44  
45  
46  
47  
48  
49

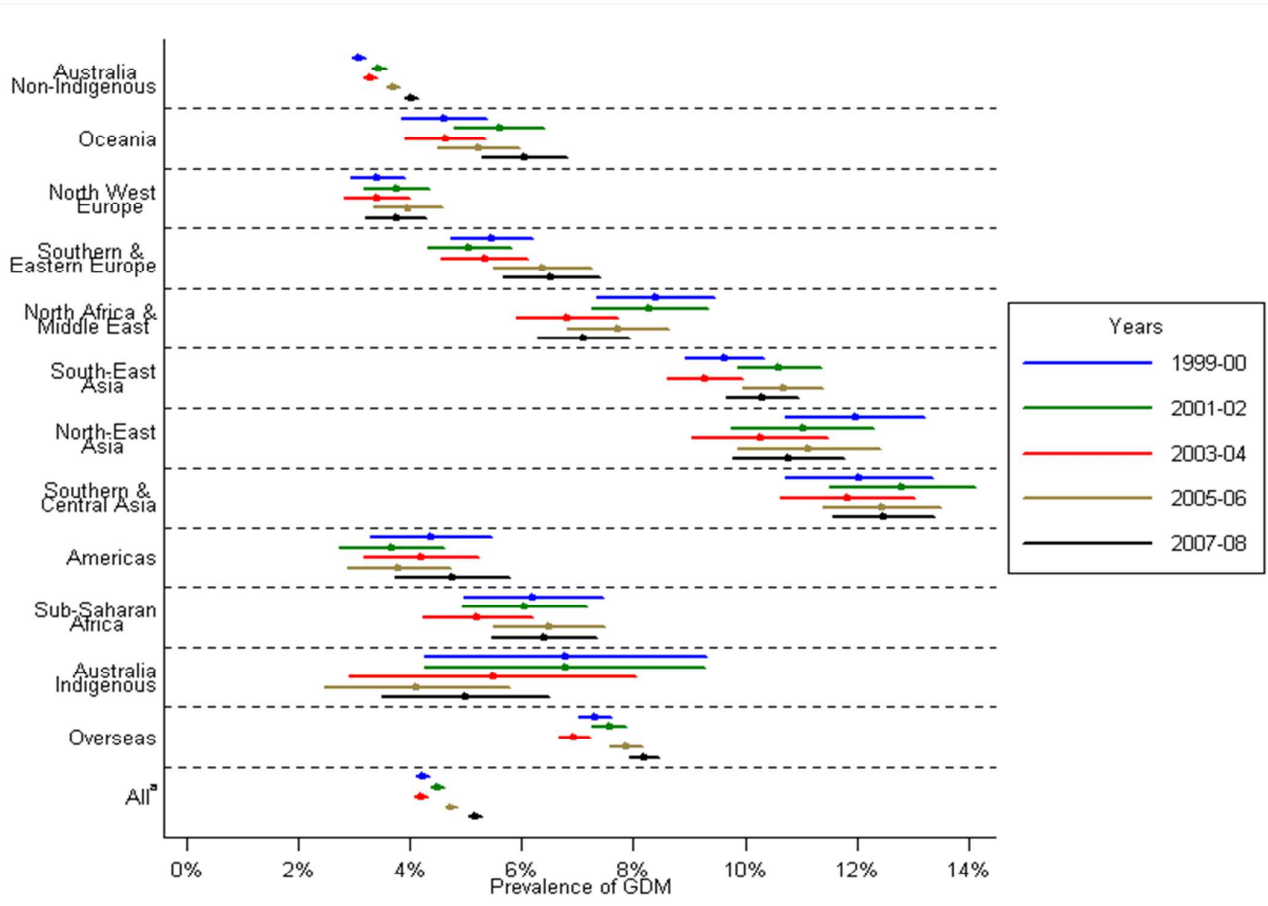

Fig. 2: Age-standardised GDM prevalence rates\* by maternal region of birth and year of delivery, Victoria 1999-2008

\* the denominator used to calculate prevalence of GDM is all pregnancies

1  
2  
3  
4  
5  
6  
7  
8  
9  
10  
11  
12  
13  
14  
15  
16  
17  
18  
19  
20  
21  
22  
23  
24  
25  
26  
27  
28  
29  
30  
31  
32  
33  
34  
35  
36  
37  
38  
39  
40  
41  
42  
43  
44  
45  
46  
47  
48  
49

For peer review only
